# Supplementary material for: Sex Differences in Comorbidity Combinations in the Swedish Population
Source: MDPI journal article supplement (doi:10.3390/biom12070949), 2022-07-06
Supplement: s1 [file s1]

**Table S2.** Significantly elevated comorbidity combinations ( $p < 0.05/5724$ ) in male participants ( $N = 11960$ ) sorted by odds ratio.

| Group of Condition 1     | Group of Condition 2     | Condition 1 ...       | ... in individuals with Condition 2 | Prevalence (%) | Odds ratio | Lower 95%-CI | Upper 95%-CI |
|--------------------------|--------------------------|-----------------------|-------------------------------------|----------------|------------|--------------|--------------|
| Psychiatric conditions   | Psychiatric conditions   | Autism                | Asperger's syndrome                 | 12.245         | 239.053    | 20.329       | 2127.416     |
| Psychiatric conditions   | Psychiatric conditions   | Asperger's syndrome   | Autism                              | 54.545         | 224.575    | 22.004       | 2157.836     |
| Psychiatric conditions   | Psychiatric conditions   | Panic disorder        | Agoraphobia                         | 80.645         | 66.537     | 26.607       | 202.097      |
| Psychiatric conditions   | Psychiatric conditions   | Agoraphobia           | Panic disorder                      | 3.516          | 65.792     | 26.376       | 199.464      |
| Psychiatric conditions   | Psychiatric conditions   | Social anxiety        | Agoraphobia                         | 51.613         | 46.104     | 20.464       | 104.423      |
| Psychiatric conditions   | Psychiatric conditions   | Agoraphobia           | Social anxiety                      | 5.424          | 45.427     | 20.501       | 101.309      |
| Psychiatric conditions   | Psychiatric conditions   | Agoraphobia           | OCD                                 | 6.154          | 26.520     | 9.298        | 65.686       |
| Psychiatric conditions   | Psychiatric conditions   | OCD                   | Agoraphobia                         | 25.806         | 25.077     | 8.603        | 63.945       |
| Psychiatric conditions   | Psychiatric conditions   | Social anxiety        | Depression                          | 15.867         | 23.560     | 17.434       | 32.232       |
| Psychiatric conditions   | Psychiatric conditions   | Depression            | Social anxiety                      | 72.881         | 23.485     | 17.382       | 32.119       |
| Psychiatric conditions   | Psychiatric conditions   | Depression            | Bipolar disease                     | 73.469         | 19.855     | 9.643        | 44.163       |
| Psychiatric conditions   | Psychiatric conditions   | Bipolar disease       | Depression                          | 2.657          | 19.390     | 9.532        | 42.676       |
| Psychiatric conditions   | Psychiatric conditions   | GAD                   | OCD                                 | 50.000         | 18.732     | 12.243       | 28.716       |
| Psychiatric conditions   | Psychiatric conditions   | OCD                   | GAD                                 | 9.774          | 18.597     | 12.176       | 28.469       |
| Psychiatric conditions   | Psychiatric conditions   | Depression            | GAD                                 | 64.662         | 18.508     | 15.230       | 22.549       |
| Psychiatric conditions   | Psychiatric conditions   | GAD                   | Depression                          | 31.734         | 18.493     | 15.218       | 22.531       |
| Psychiatric conditions   | Psychiatric conditions   | GAD                   | Panic disorder                      | 41.210         | 17.327     | 14.052       | 21.361       |
| Psychiatric conditions   | Psychiatric conditions   | Panic disorder        | GAD                                 | 44.060         | 17.315     | 14.043       | 21.346       |
| Neurological diseases    | Neurological diseases    | Meniere's disease     | Bothersome tinnitus                 | 1.656          | 17.218     | 4.703        | 56.835       |
| Neurological diseases    | Neurological diseases    | Bothersome tinnitus   | Meniere's disease                   | 33.333         | 16.954     | 4.644        | 56.003       |
| Psychiatric conditions   | Psychiatric conditions   | Bipolar disease       | OCD                                 | 5.385          | 16.419     | 6.157        | 38.674       |
| Psychiatric conditions   | Psychiatric conditions   | Social anxiety        | GAD                                 | 21.353         | 16.225     | 12.169       | 21.605       |
| Psychiatric conditions   | Psychiatric conditions   | GAD                   | Social anxiety                      | 48.136         | 16.224     | 12.165       | 21.609       |
| Psychiatric conditions   | Psychiatric conditions   | OCD                   | Bipolar disease                     | 14.286         | 15.660     | 5.781        | 37.400       |
| Psychiatric conditions   | Psychiatric conditions   | Panic disorder        | OCD                                 | 45.385         | 15.508     | 10.100       | 23.777       |
| Psychiatric conditions   | Psychiatric conditions   | OCD                   | Panic disorder                      | 8.298          | 15.342     | 10.014       | 23.465       |
| Psychiatric conditions   | Psychiatric conditions   | Social anxiety        | OCD                                 | 26.923         | 14.412     | 8.717        | 23.227       |
| Psychiatric conditions   | Psychiatric conditions   | OCD                   | Social anxiety                      | 11.864         | 14.363     | 8.697        | 23.126       |
| Psychiatric conditions   | Psychiatric conditions   | Social anxiety        | Panic disorder                      | 18.987         | 14.167     | 10.611       | 18.879       |
| Psychiatric conditions   | Psychiatric conditions   | Panic disorder        | Social anxiety                      | 45.763         | 14.152     | 10.599       | 18.860       |
| Psychiatric conditions   | Psychiatric conditions   | Depression            | Burnout                             | 56.613         | 13.867     | 11.382       | 16.919       |
| Psychiatric conditions   | Psychiatric conditions   | Burnout               | Depression                          | 25.904         | 13.625     | 11.191       | 16.610       |
| Musculoskeletal diseases | Musculoskeletal diseases | Chronic back pain     | Chronic shoulder pain               | 41.155         | 13.572     | 10.039       | 18.267       |
| Musculoskeletal diseases | Musculoskeletal diseases | Chronic shoulder pain | Chronic back pain                   | 19.689         | 13.509     | 9.991        | 18.184       |
| Psychiatric conditions   | Psychiatric conditions   | Bipolar disease       | Social anxiety                      | 4.746          | 12.605     | 5.708        | 26.121       |
| Psychiatric conditions   | Psychiatric conditions   | Bipolar disease       | Burnout                             | 3.065          | 12.432     | 6.233        | 24.293       |
| Psychiatric conditions   | Psychiatric conditions   | Social anxiety        | Bipolar disease                     | 28.571         | 12.230     | 5.459        | 25.674       |
| Psychiatric conditions   | Psychiatric conditions   | PTSD                  | Panic disorder                      | 5.063          | 12.162     | 6.826        | 21.538       |
| Psychiatric conditions   | Psychiatric conditions   | Panic disorder        | PTSD                                | 50.704         | 12.091     | 6.733        | 21.599       |
| Psychiatric conditions   | Psychiatric conditions   | Agoraphobia           | GAD                                 | 2.406          | 11.978     | 5.383        | 26.096       |
| Psychiatric conditions   | Psychiatric conditions   | GAD                   | Agoraphobia                         | 51.613         | 11.954     | 5.318        | 26.310       |
| Psychiatric conditions   | Psychiatric conditions   | GAD                   | PTSD                                | 45.070         | 11.953     | 6.629        | 21.357       |
| Psychiatric conditions   | Psychiatric conditions   | Depression            | Agoraphobia                         | 64.516         | 11.866     | 5.393        | 27.413       |
| Psychiatric conditions   | Psychiatric conditions   | Agoraphobia           | Depression                          | 1.476          | 11.845     | 5.428        | 27.202       |
| Cardiovascular diseases  | Cardiovascular diseases  | Hyperlipidemia        | Angina pectoris                     | 44.828         | 11.835     | 4.799        | 28.981       |
| Psychiatric conditions   | Psychiatric conditions   | Asperger's syndrome   | Social anxiety                      | 4.407          | 11.779     | 4.991        | 26.157       |
| Psychiatric conditions   | Psychiatric conditions   | Social anxiety        | Asperger's syndrome                 | 26.531         | 11.774     | 4.889        | 26.543       |
| Psychiatric conditions   | Psychiatric conditions   | Burnout               | Bipolar disease                     | 38.776         | 11.637     | 5.784        | 22.903       |

| Group of Condition 1     | Group of Condition 2     | Condition 1 ...       | ... in individuals with Condition 2 | Prevalence (%) | Odds ratio | Lower 95%-CI | Upper 95%-CI |
|--------------------------|--------------------------|-----------------------|-------------------------------------|----------------|------------|--------------|--------------|
| Psychiatric conditions   | Psychiatric conditions   | PTSD                  | GAD                                 | 4.812          | 11.522     | 6.442        | 20.395       |
| Cardiovascular diseases  | Cardiovascular diseases  | Angina pectoris       | Hyperlipidemia                      | 3.325          | 11.433     | 4.473        | 28.953       |
| Psychiatric conditions   | Psychiatric conditions   | OCD                   | Depression                          | 5.461          | 11.330     | 7.449        | 17.421       |
| Psychiatric conditions   | Psychiatric conditions   | Depression            | OCD                                 | 56.923         | 11.316     | 7.420        | 17.435       |
| Psychiatric conditions   | Psychiatric conditions   | Depression            | Panic disorder                      | 55.134         | 11.209     | 9.309        | 13.505       |
| Psychiatric conditions   | Psychiatric conditions   | Panic disorder        | Depression                          | 28.930         | 11.194     | 9.298        | 13.486       |
| Digestive diseases       | Digestive diseases       | Fecal incontinence    | Stomach ulcer                       | 4.110          | 11.119     | 4.093        | 25.462       |
| Digestive diseases       | Digestive diseases       | Stomach ulcer         | Fecal incontinence                  | 9.836          | 11.006     | 4.051        | 25.216       |
| Psychiatric conditions   | Psychiatric conditions   | Depression            | PTSD                                | 66.197         | 10.255     | 5.783        | 18.508       |
| Psychiatric conditions   | Psychiatric conditions   | Bipolar disease       | GAD                                 | 2.857          | 10.216     | 5.115        | 19.974       |
| Psychiatric conditions   | Psychiatric conditions   | GAD                   | Bipolar disease                     | 38.776         | 10.137     | 4.997        | 20.133       |
| Psychiatric conditions   | Psychiatric conditions   | PTSD                  | Depression                          | 3.469          | 10.112     | 5.735        | 18.157       |
| Digestive diseases       | Digestive diseases       | Lactose intolerance   | Celiac disease                      | 33.684         | 9.963      | 6.044        | 16.056       |
| Digestive diseases       | Digestive diseases       | Celiac disease        | Lactose intolerance                 | 4.938          | 9.947      | 6.035        | 16.026       |
| Psychiatric conditions   | Psychiatric conditions   | Bipolar disease       | Panic disorder                      | 2.532          | 9.670      | 4.827        | 18.983       |
| Psychiatric conditions   | Psychiatric conditions   | Panic disorder        | Bipolar disease                     | 36.735         | 9.479      | 4.679        | 18.778       |
| Psychiatric conditions   | Psychiatric conditions   | OCD                   | PTSD                                | 11.268         | 9.460      | 3.404        | 22.302       |
| Cardiovascular diseases  | Cardiovascular diseases  | Hypertension          | Angina pectoris                     | 44.828         | 9.132      | 3.623        | 23.001       |
| Digestive diseases       | Digestive diseases       | Gastritis             | Stomach ulcer                       | 41.781         | 9.095      | 6.273        | 13.109       |
| Digestive diseases       | Digestive diseases       | Stomach ulcer         | Gastritis                           | 6.846          | 9.062      | 6.248        | 13.065       |
| Psychiatric conditions   | Psychiatric conditions   | Panic disorder        | Burnout                             | 31.290         | 8.818      | 7.045        | 11.007       |
| Psychiatric conditions   | Psychiatric conditions   | GAD                   | Burnout                             | 28.710         | 8.757      | 6.957        | 10.987       |
| Psychiatric conditions   | Psychiatric conditions   | Agoraphobia           | Burnout                             | 1.452          | 8.754      | 3.661        | 19.541       |
| Psychiatric conditions   | Psychiatric conditions   | Burnout               | Panic disorder                      | 27.286         | 8.696      | 6.943        | 10.859       |
| Psychiatric conditions   | Psychiatric conditions   | Burnout               | Agoraphobia                         | 29.032         | 8.689      | 3.608        | 19.566       |
| Psychiatric conditions   | Psychiatric conditions   | Burnout               | GAD                                 | 26.767         | 8.668      | 6.879        | 10.887       |
| Cardiovascular diseases  | Cardiovascular diseases  | Angina pectoris       | Hypertension                        | 2.170          | 8.612      | 3.341        | 22.389       |
| Psychiatric conditions   | Musculoskeletal diseases | PTSD                  | Chronic shoulder pain               | 5.415          | 7.967      | 3.483        | 16.410       |
| Psychiatric conditions   | Psychiatric conditions   | Social anxiety        | PTSD                                | 21.127         | 7.944      | 3.664        | 15.900       |
| Psychiatric conditions   | Psychiatric conditions   | PTSD                  | Social anxiety                      | 5.085          | 7.940      | 3.677        | 15.830       |
| Psychiatric conditions   | Psychiatric conditions   | Social anxiety        | Burnout                             | 13.065         | 7.713      | 5.589        | 10.536       |
| Psychiatric conditions   | Psychiatric conditions   | Burnout               | Social anxiety                      | 27.458         | 7.614      | 5.506        | 10.427       |
| Musculoskeletal diseases | Psychiatric conditions   | Chronic shoulder pain | PTSD                                | 21.127         | 7.487      | 3.274        | 15.457       |
| Psychiatric conditions   | Psychiatric conditions   | Burnout               | OCD                                 | 23.846         | 6.827      | 4.109        | 11.018       |
| Psychiatric conditions   | Psychiatric conditions   | OCD                   | Burnout                             | 5.000          | 6.757      | 4.106        | 10.783       |
| Cardiovascular diseases  | Cardiovascular diseases  | Hyperlipidemia        | Hypertension                        | 23.205         | 6.366      | 4.852        | 8.316        |
| Psychiatric conditions   | Urogenital diseases      | OCD                   | Prostate problems                   | 3.216          | 6.314      | 2.935        | 12.302       |
| Psychiatric conditions   | Psychiatric conditions   | Asperger's syndrome   | Depression                          | 1.919          | 6.247      | 2.947        | 13.357       |
| Psychiatric conditions   | Neurological diseases    | OCD                   | Dyslexia                            | 4.585          | 6.220      | 3.361        | 10.794       |
| Neurological diseases    | Psychiatric conditions   | Dyslexia              | OCD                                 | 12.308         | 6.219      | 3.364        | 10.778       |
| Urogenital diseases      | Cardiovascular diseases  | Recurring UTI         | Hypertension                        | 2.003          | 6.211      | 2.665        | 13.220       |
| Cardiovascular diseases  | Cardiovascular diseases  | Hypertension          | Hyperlipidemia                      | 35.550         | 6.127      | 4.642        | 8.052        |
| Psychiatric conditions   | Psychiatric conditions   | PTSD                  | Burnout                             | 3.387          | 6.110      | 3.195        | 11.183       |
| Psychiatric conditions   | Psychiatric conditions   | Depression            | Asperger's syndrome                 | 53.061         | 5.833      | 2.680        | 12.697       |
| Psychiatric conditions   | Psychiatric conditions   | Burnout               | PTSD                                | 29.577         | 5.805      | 3.033        | 10.634       |
| Cardiovascular diseases  | Endocrine diseases       | Hyperlipidemia        | Diabetes                            | 24.675         | 5.751      | 3.004        | 10.537       |
| Endocrine diseases       | Cardiovascular diseases  | Diabetes              | Hyperlipidemia                      | 4.859          | 5.720      | 2.939        | 10.636       |
| Urogenital diseases      | Psychiatric conditions   | Prostate problems     | OCD                                 | 8.462          | 5.546      | 2.546        | 10.952       |
| Psychiatric conditions   | Digestive diseases       | Burnout               | Fecal incontinence                  | 21.311         | 5.499      | 2.574        | 10.923       |
| Psychiatric conditions   | Urogenital diseases      | GAD                   | Recurring UTI                       | 21.569         | 5.477      | 2.559        | 10.887       |

| Group of Condition 1     | Group of Condition 2     | Condition 1 ...       | ... in individuals with Condition 2 | Prevalence (%) | Odds ratio | Lower 95%-CI | Upper 95%-CI |
|--------------------------|--------------------------|-----------------------|-------------------------------------|----------------|------------|--------------|--------------|
| Digestive diseases       | Psychiatric conditions   | Fecal incontinence    | Burnout                             | 2.097          | 5.451      | 2.578        | 10.672       |
| Urogenital diseases      | Psychiatric conditions   | Recurring UTI         | GAD                                 | 1.654          | 5.384      | 2.496        | 10.793       |
| Musculoskeletal diseases | Musculoskeletal diseases | Chronic back pain     | Sciatica                            | 21.348         | 5.253      | 4.028        | 6.796        |
| Musculoskeletal diseases | Musculoskeletal diseases | Sciatica              | Chronic back pain                   | 19.689         | 5.137      | 3.937        | 6.650        |
| Digestive diseases       | Digestive diseases       | Gastritis             | Gastric acid reflux                 | 21.529         | 4.764      | 4.041        | 5.609        |
| Digestive diseases       | Digestive diseases       | Gastric acid reflux   | Gastritis                           | 37.935         | 4.761      | 4.038        | 5.606        |
| Urogenital diseases      | Digestive diseases       | Recurring UTI         | Gastritis                           | 1.347          | 4.658      | 2.282        | 8.905        |
| Digestive diseases       | Digestive diseases       | Celiac disease        | IBS                                 | 2.771          | 4.643      | 2.295        | 8.549        |
| Digestive diseases       | Digestive diseases       | IBS                   | Celiac disease                      | 12.632         | 4.581      | 2.263        | 8.441        |
| Skin diseases            | Digestive diseases       | Eczema                | Fecal incontinence                  | 32.787         | 4.523      | 2.464        | 8.139        |
| Digestive diseases       | Skin diseases            | Fecal incontinence    | Eczema                              | 1.254          | 4.489      | 2.446        | 8.077        |
| Endocrine diseases       | Cardiovascular diseases  | Thyroid disease       | Hyperlipidemia                      | 3.581          | 4.454      | 2.231        | 8.324        |
| Psychiatric conditions   | Musculoskeletal diseases | GAD                   | Chronic shoulder pain               | 17.690         | 4.272      | 2.925        | 6.105        |
| Digestive diseases       | Digestive diseases       | Stomach ulcer         | Gastric acid reflux                 | 3.567          | 4.243      | 2.922        | 6.110        |
| Digestive diseases       | Digestive diseases       | Gastric acid reflux   | Stomach ulcer                       | 38.356         | 4.236      | 2.918        | 6.100        |
| Urogenital diseases      | Skin diseases            | Recurring UTI         | Acne                                | 1.160          | 4.164      | 2.187        | 7.724        |
| Digestive diseases       | Cardiovascular diseases  | Stomach ulcer         | Cardiac arrhythmia                  | 4.762          | 4.160      | 2.184        | 7.307        |
| Digestive diseases       | Digestive diseases       | Gastritis             | Gallbladder problems                | 23.232         | 4.136      | 2.443        | 6.735        |
| Cardiovascular diseases  | Digestive diseases       | Cardiac arrhythmia    | Stomach ulcer                       | 9.589          | 4.083      | 2.144        | 7.172        |
| Musculoskeletal diseases | Psychiatric conditions   | Chronic shoulder pain | GAD                                 | 7.368          | 4.082      | 2.793        | 5.840        |
| Neurological diseases    | Psychiatric conditions   | Dyslexia              | Social anxiety                      | 10.508         | 4.041      | 2.515        | 6.228        |
| Digestive diseases       | Digestive diseases       | Gallbladder problems  | Gastritis                           | 2.581          | 4.022      | 2.375        | 6.549        |
| Psychiatric conditions   | Neurological diseases    | Social anxiety        | Dyslexia                            | 8.883          | 3.992      | 2.482        | 6.159        |
| Psychiatric conditions   | Musculoskeletal diseases | Burnout               | Chronic shoulder pain               | 20.578         | 3.760      | 2.590        | 5.341        |
| Neurological diseases    | Psychiatric conditions   | Dyslexia              | Burnout                             | 8.871          | 3.731      | 2.621        | 5.205        |
| Psychiatric conditions   | Neurological diseases    | Burnout               | Dyslexia                            | 15.759         | 3.730      | 2.618        | 5.208        |
| Musculoskeletal diseases | Psychiatric conditions   | Chronic shoulder pain | Burnout                             | 9.194          | 3.687      | 2.537        | 5.245        |
| Digestive diseases       | Psychiatric conditions   | IBS                   | Panic disorder                      | 9.986          | 3.553      | 2.619        | 4.751        |
| Digestive diseases       | Digestive diseases       | Lactose intolerance   | Stomach ulcer                       | 14.384         | 3.508      | 2.087        | 5.613        |
| Digestive diseases       | Digestive diseases       | Stomach ulcer         | Lactose intolerance                 | 3.241          | 3.504      | 2.086        | 5.604        |
| Psychiatric conditions   | Digestive diseases       | Panic disorder        | IBS                                 | 16.397         | 3.500      | 2.578        | 4.683        |
| Digestive diseases       | Psychiatric conditions   | IBS                   | Social anxiety                      | 9.831          | 3.459      | 2.186        | 5.255        |
| Psychiatric conditions   | Musculoskeletal diseases | Depression            | Chronic shoulder pain               | 31.408         | 3.393      | 2.470        | 4.609        |
| Psychiatric conditions   | Digestive diseases       | Social anxiety        | IBS                                 | 6.697          | 3.379      | 2.135        | 5.136        |
| Musculoskeletal diseases | Musculoskeletal diseases | Chronic shoulder pain | Osteoarthritis                      | 9.000          | 3.350      | 2.110        | 5.148        |
| Cardiovascular diseases  | Cardiovascular diseases  | Cardiac arrhythmia    | Hypertension                        | 8.013          | 3.331      | 2.279        | 4.777        |
| Cardiovascular diseases  | Cardiovascular diseases  | Hypertension          | Cardiac arrhythmia                  | 16.327         | 3.306      | 2.259        | 4.750        |
| Musculoskeletal diseases | Psychiatric conditions   | Chronic shoulder pain | Depression                          | 6.421          | 3.293      | 2.394        | 4.478        |
| Psychiatric conditions   | Musculoskeletal diseases | Social anxiety        | Chronic back pain                   | 6.390          | 3.270      | 2.139        | 4.837        |
| Musculoskeletal diseases | Psychiatric conditions   | Chronic back pain     | Social anxiety                      | 12.542         | 3.241      | 2.119        | 4.800        |
| Musculoskeletal diseases | Neurological diseases    | Chronic shoulder pain | Bothersome tinnitus                 | 8.278          | 3.197      | 1.894        | 5.127        |
| Digestive diseases       | Digestive diseases       | Gastric acid reflux   | Gallbladder problems                | 30.303         | 3.158      | 1.954        | 4.983        |
| Digestive diseases       | Psychiatric conditions   | Gastritis             | Burnout                             | 18.871         | 3.149      | 2.478        | 3.969        |
| Digestive diseases       | Digestive diseases       | Gallbladder problems  | Gastric acid reflux                 | 1.911          | 3.126      | 1.934        | 4.930        |
| Psychiatric conditions   | Digestive diseases       | Burnout               | Gastritis                           | 13.131         | 3.124      | 2.459        | 3.938        |
| Musculoskeletal diseases | Musculoskeletal diseases | Osteoarthritis        | Chronic shoulder pain               | 12.996         | 3.007      | 1.891        | 4.636        |
| Digestive diseases       | Psychiatric conditions   | IBS                   | GAD                                 | 8.271          | 2.967      | 2.131        | 4.051        |
| Psychiatric conditions   | Cardiovascular diseases  | Burnout               | Cardiac arrhythmia                  | 13.605         | 2.931      | 1.999        | 4.188        |
| Psychiatric conditions   | Digestive diseases       | GAD                   | IBS                                 | 12.702         | 2.927      | 2.102        | 3.999        |
| Psychiatric conditions   | Cardiovascular diseases  | Social anxiety        | Hypertension                        | 4.674          | 2.916      | 1.792        | 4.557        |

| Group of Condition 1     | Group of Condition 2     | Condition 1 ...       | ... in individuals with Condition 2 | Prevalence (%) | Odds ratio | Lower 95%-CI | Upper 95%-CI |
|--------------------------|--------------------------|-----------------------|-------------------------------------|----------------|------------|--------------|--------------|
| Neurological diseases    | Psychiatric conditions   | Dyslexia              | GAD                                 | 7.368          | 2.915      | 2.008        | 4.129        |
| Psychiatric conditions   | Neurological diseases    | GAD                   | Dyslexia                            | 14.040         | 2.894      | 1.992        | 4.104        |
| Psychiatric conditions   | Neurological diseases    | GAD                   | Bothersome tinnitus                 | 13.576         | 2.857      | 1.900        | 4.174        |
| Cardiovascular diseases  | Psychiatric conditions   | Cardiac arrhythmia    | Burnout                             | 6.452          | 2.850      | 1.940        | 4.079        |
| Psychiatric conditions   | Urogenital diseases      | GAD                   | Prostate problems                   | 9.942          | 2.811      | 1.824        | 4.192        |
| Psychiatric conditions   | Musculoskeletal diseases | GAD                   | Chronic back pain                   | 12.781         | 2.804      | 2.068        | 3.743        |
| Musculoskeletal diseases | Psychiatric conditions   | Chronic back pain     | GAD                                 | 11.128         | 2.768      | 2.041        | 3.697        |
| Digestive diseases       | Digestive diseases       | IBS                   | Lactose intolerance                 | 8.179          | 2.764      | 1.967        | 3.799        |
| Digestive diseases       | Cardiovascular diseases  | Gastritis             | Cardiac arrhythmia                  | 18.027         | 2.754      | 1.952        | 3.809        |
| Musculoskeletal diseases | Musculoskeletal diseases | Chronic shoulder pain | Sciatica                            | 7.865          | 2.752      | 1.797        | 4.081        |
| Neurological diseases    | Psychiatric conditions   | Dyslexia              | Depression                          | 6.494          | 2.748      | 2.047        | 3.648        |
| Digestive diseases       | Digestive diseases       | Lactose intolerance   | IBS                                 | 12.240         | 2.746      | 1.954        | 3.773        |
| Psychiatric conditions   | Neurological diseases    | Depression            | Dyslexia                            | 25.215         | 2.734      | 2.034        | 3.634        |
| Digestive diseases       | Psychiatric conditions   | IBS                   | Depression                          | 7.159          | 2.710      | 2.088        | 3.485        |
| Digestive diseases       | Digestive diseases       | IBS                   | Gastritis                           | 8.642          | 2.709      | 2.021        | 3.578        |
| Digestive diseases       | Digestive diseases       | Gastritis             | IBS                                 | 17.783         | 2.705      | 2.018        | 3.573        |
| Musculoskeletal diseases | Neurological diseases    | Chronic shoulder pain | Migraine                            | 5.282          | 2.699      | 1.820        | 3.890        |
| Cardiovascular diseases  | Digestive diseases       | Cardiac arrhythmia    | Gastritis                           | 5.948          | 2.691      | 1.906        | 3.723        |
| Neurological diseases    | Musculoskeletal diseases | Migraine              | Chronic shoulder pain               | 16.245         | 2.689      | 1.812        | 3.876        |
| Psychiatric conditions   | Digestive diseases       | Depression            | IBS                                 | 22.402         | 2.688      | 2.070        | 3.459        |
| Neurological diseases    | Psychiatric conditions   | Bothersome tinnitus   | GAD                                 | 6.165          | 2.682      | 1.782        | 3.921        |
| Musculoskeletal diseases | Musculoskeletal diseases | Sciatica              | Chronic shoulder pain               | 15.162         | 2.673      | 1.742        | 3.971        |
| Psychiatric conditions   | Musculoskeletal diseases | Burnout               | Chronic back pain                   | 13.472         | 2.631      | 1.953        | 3.492        |
| Digestive diseases       | Musculoskeletal diseases | Gastritis             | Chronic shoulder pain               | 17.690         | 2.625      | 1.816        | 3.710        |
| Musculoskeletal diseases | Psychiatric conditions   | Chronic back pain     | Burnout                             | 12.581         | 2.616      | 1.941        | 3.472        |
| Musculoskeletal diseases | Digestive diseases       | Chronic shoulder pain | Gastritis                           | 5.499          | 2.594      | 1.793        | 3.665        |
| Psychiatric conditions   | Digestive diseases       | Panic disorder        | Gastritis                           | 13.917         | 2.579      | 2.023        | 3.258        |
| Digestive diseases       | Psychiatric conditions   | Gastritis             | Panic disorder                      | 17.440         | 2.573      | 2.017        | 3.252        |
| Psychiatric conditions   | Digestive diseases       | Panic disorder        | Gastric acid reflux                 | 11.975         | 2.558      | 2.091        | 3.116        |
| Pulmonary diseases       | Skin diseases            | Asthma                | Eczema                              | 17.116         | 2.543      | 2.152        | 2.996        |
| Digestive diseases       | Psychiatric conditions   | Gastric acid reflux   | Panic disorder                      | 26.442         | 2.542      | 2.077        | 3.097        |
| Skin diseases            | Pulmonary diseases       | Eczema                | Asthma                              | 26.025         | 2.542      | 2.151        | 2.995        |
| Digestive diseases       | Musculoskeletal diseases | Gastritis             | Chronic back pain                   | 16.062         | 2.528      | 1.941        | 3.255        |
| Psychiatric conditions   | Musculoskeletal diseases | Depression            | Chronic back pain                   | 23.316         | 2.523      | 1.986        | 3.182        |
| Psychiatric conditions   | Cardiovascular diseases  | Panic disorder        | Cardiac arrhythmia                  | 13.265         | 2.520      | 1.686        | 3.656        |
| Musculoskeletal diseases | Digestive diseases       | Chronic back pain     | Gastritis                           | 10.438         | 2.509      | 1.927        | 3.232        |
| Psychiatric conditions   | Musculoskeletal diseases | Panic disorder        | Chronic back pain                   | 13.644         | 2.504      | 1.849        | 3.339        |
| Musculoskeletal diseases | Psychiatric conditions   | Chronic back pain     | Depression                          | 9.963          | 2.500      | 1.967        | 3.152        |
| Psychiatric conditions   | Digestive diseases       | GAD                   | Gastric acid reflux                 | 11.274         | 2.482      | 2.016        | 3.042        |
| Digestive diseases       | Musculoskeletal diseases | Gastric acid reflux   | Chronic shoulder pain               | 28.881         | 2.473      | 1.808        | 3.341        |
| Musculoskeletal diseases | Psychiatric conditions   | Chronic back pain     | Panic disorder                      | 11.111         | 2.467      | 1.821        | 3.291        |
| Digestive diseases       | Psychiatric conditions   | Gastric acid reflux   | GAD                                 | 26.617         | 2.467      | 2.003        | 3.025        |
| Musculoskeletal diseases | Digestive diseases       | Chronic shoulder pain | Gastric acid reflux                 | 5.096          | 2.461      | 1.800        | 3.325        |
| Neurological diseases    | Neurological diseases    | Migraine              | Dyslexia                            | 16.046         | 2.440      | 1.700        | 3.416        |
| Neurological diseases    | Neurological diseases    | Dyslexia              | Migraine                            | 6.573          | 2.436      | 1.698        | 3.411        |
| Psychiatric conditions   | Neurological diseases    | Burnout               | Migraine                            | 10.798         | 2.422      | 1.843        | 3.142        |
| Cardiovascular diseases  | Psychiatric conditions   | Cardiac arrhythmia    | Panic disorder                      | 5.485          | 2.413      | 1.612        | 3.506        |
| Neurological diseases    | Psychiatric conditions   | Migraine              | Burnout                             | 14.839         | 2.409      | 1.834        | 3.126        |
| Psychiatric conditions   | Musculoskeletal diseases | GAD                   | Sciatica                            | 10.112         | 2.393      | 1.710        | 3.280        |
| Psychiatric conditions   | Digestive diseases       | Depression            | Gastritis                           | 21.998         | 2.372      | 1.953        | 2.868        |

| Group of Condition 1     | Group of Condition 2     | Condition 1 ...     | ... in individuals with Condition 2 | Prevalence (%) | Odds ratio | Lower 95%-CI | Upper 95%-CI |
|--------------------------|--------------------------|---------------------|-------------------------------------|----------------|------------|--------------|--------------|
| Digestive diseases       | Psychiatric conditions   | Gastritis           | Depression                          | 14.465         | 2.367      | 1.949        | 2.862        |
| Neurological diseases    | Psychiatric conditions   | Migraine            | Depression                          | 12.989         | 2.354      | 1.925        | 2.864        |
| Psychiatric conditions   | Neurological diseases    | Depression          | Migraine                            | 20.657         | 2.352      | 1.923        | 2.862        |
| Digestive diseases       | Digestive diseases       | IBS                 | Gastric acid reflux                 | 6.752          | 2.315      | 1.796        | 2.959        |
| Digestive diseases       | Digestive diseases       | Gastric acid reflux | IBS                                 | 24.480         | 2.307      | 1.789        | 2.949        |
| Digestive diseases       | Urogenital diseases      | Gastric acid reflux | Prostate problems                   | 24.269         | 2.303      | 1.717        | 3.057        |
| Psychiatric conditions   | Digestive diseases       | GAD                 | Gastritis                           | 11.111         | 2.298      | 1.775        | 2.942        |
| Digestive diseases       | Psychiatric conditions   | Gastritis           | GAD                                 | 14.887         | 2.290      | 1.767        | 2.933        |
| Psychiatric conditions   | Cardiovascular diseases  | Burnout             | Hyperlipidemia                      | 11.253         | 2.276      | 1.564        | 3.232        |
| Musculoskeletal diseases | Psychiatric conditions   | Sciatica            | GAD                                 | 8.120          | 2.264      | 1.616        | 3.109        |
| Psychiatric conditions   | Neurological diseases    | Depression          | Bothersome tinnitus                 | 20.199         | 2.240      | 1.606        | 3.076        |
| Psychiatric conditions   | Musculoskeletal diseases | Panic disorder      | Sciatica                            | 11.423         | 2.233      | 1.611        | 3.036        |
| Urogenital diseases      | Digestive diseases       | Prostate problems   | Gastric acid reflux                 | 5.287          | 2.200      | 1.643        | 2.915        |
| Psychiatric conditions   | Cardiovascular diseases  | Depression          | Hyperlipidemia                      | 16.880         | 2.184      | 1.592        | 2.952        |
| Psychiatric conditions   | Musculoskeletal diseases | Depression          | Sciatica                            | 18.727         | 2.158      | 1.668        | 2.765        |
| Musculoskeletal diseases | Psychiatric conditions   | Sciatica            | Panic disorder                      | 8.579          | 2.130      | 1.535        | 2.900        |
| Digestive diseases       | Musculoskeletal diseases | Gastritis           | Sciatica                            | 14.232         | 2.126      | 1.601        | 2.784        |
| Cardiovascular diseases  | Digestive diseases       | Cardiac arrhythmia  | Gastric acid reflux                 | 4.586          | 2.123      | 1.562        | 2.846        |
| Digestive diseases       | Cardiovascular diseases  | Gastric acid reflux | Cardiac arrhythmia                  | 24.490         | 2.122      | 1.562        | 2.846        |
| Neurological diseases    | Psychiatric conditions   | Bothersome tinnitus | Depression                          | 4.502          | 2.120      | 1.520        | 2.910        |
| Digestive diseases       | Skin diseases            | Gastric acid reflux | Acne                                | 20.574         | 2.114      | 1.815        | 2.458        |
| Skin diseases            | Digestive diseases       | Acne                | Gastric acid reflux                 | 21.465         | 2.106      | 1.808        | 2.448        |
| Neurological diseases    | Psychiatric conditions   | Migraine            | GAD                                 | 13.383         | 2.091      | 1.586        | 2.718        |
| Psychiatric conditions   | Cardiovascular diseases  | Depression          | Hypertension                        | 17.028         | 2.090      | 1.603        | 2.699        |
| Psychiatric conditions   | Neurological diseases    | Panic disorder      | Migraine                            | 11.150         | 2.089      | 1.595        | 2.700        |
| Digestive diseases       | Psychiatric conditions   | Gastric acid reflux | Burnout                             | 23.710         | 2.089      | 1.680        | 2.582        |
| Psychiatric conditions   | Digestive diseases       | Depression          | Gastric acid reflux                 | 19.236         | 2.089      | 1.777        | 2.448        |
| Psychiatric conditions   | Digestive diseases       | Burnout             | Gastric acid reflux                 | 9.363          | 2.088      | 1.680        | 2.579        |
| Neurological diseases    | Psychiatric conditions   | Migraine            | Panic disorder                      | 13.361         | 2.087      | 1.593        | 2.698        |
| Digestive diseases       | Psychiatric conditions   | Gastric acid reflux | Depression                          | 22.288         | 2.083      | 1.772        | 2.442        |
| Psychiatric conditions   | Neurological diseases    | GAD                 | Migraine                            | 10.446         | 2.079      | 1.577        | 2.704        |
| Skin diseases            | Skin diseases            | Herpes              | Acne                                | 23.321         | 2.079      | 1.801        | 2.394        |
| Musculoskeletal diseases | Psychiatric conditions   | Sciatica            | Depression                          | 7.380          | 2.069      | 1.599        | 2.652        |
| Musculoskeletal diseases | Digestive diseases       | Sciatica            | Gastritis                           | 8.530          | 2.061      | 1.551        | 2.701        |
| Skin diseases            | Skin diseases            | Acne                | Herpes                              | 21.269         | 2.061      | 1.786        | 2.373        |
| Psychiatric conditions   | Cardiovascular diseases  | Burnout             | Hypertension                        | 10.851         | 2.055      | 1.487        | 2.791        |
| Cardiovascular diseases  | Psychiatric conditions   | Hyperlipidemia      | Depression                          | 4.871          | 2.020      | 1.474        | 2.727        |
| Psychiatric conditions   | Digestive diseases       | GAD                 | Lactose intolerance                 | 10.802         | 2.018      | 1.483        | 2.699        |
| Digestive diseases       | Psychiatric conditions   | Lactose intolerance | GAD                                 | 10.526         | 2.006      | 1.474        | 2.683        |
| Skin diseases            | Digestive diseases       | Herpes              | Gastric acid reflux                 | 24.076         | 1.992      | 1.724        | 2.297        |
| Digestive diseases       | Skin diseases            | Gastric acid reflux | Herpes                              | 21.047         | 1.990      | 1.723        | 2.295        |
| Musculoskeletal diseases | Neurological diseases    | Chronic back pain   | Migraine                            | 8.803          | 1.965      | 1.448        | 2.620        |
| Neurological diseases    | Musculoskeletal diseases | Migraine            | Chronic back pain                   | 12.953         | 1.964      | 1.447        | 2.618        |
| Skin diseases            | Urogenital diseases      | Herpes              | Prostate problems                   | 21.053         | 1.954      | 1.446        | 2.611        |
| Cardiovascular diseases  | Psychiatric conditions   | Hypertension        | Depression                          | 7.528          | 1.930      | 1.480        | 2.492        |
| Digestive diseases       | Musculoskeletal diseases | Gastric acid reflux | Chronic back pain                   | 23.489         | 1.913      | 1.515        | 2.397        |
| Musculoskeletal diseases | Digestive diseases       | Chronic back pain   | Gastric acid reflux                 | 8.662          | 1.905      | 1.509        | 2.387        |
| Skin diseases            | Skin diseases            | Eczema              | Acne                                | 21.429         | 1.871      | 1.609        | 2.170        |
| Digestive diseases       | Digestive diseases       | Gastritis           | Lactose intolerance                 | 13.117         | 1.870      | 1.414        | 2.437        |
| Skin diseases            | Skin diseases            | Acne                | Eczema                              | 22.006         | 1.868      | 1.607        | 2.166        |

| Group of Condition 1    | Group of Condition 2    | Condition 1 ...     | ... in individuals with Condition 2 | Prevalence (%) | Odds ratio | Lower 95%-CI | Upper 95%-CI |
|-------------------------|-------------------------|---------------------|-------------------------------------|----------------|------------|--------------|--------------|
| Digestive diseases      | Digestive diseases      | Lactose intolerance | Gastritis                           | 9.540          | 1.862      | 1.408        | 2.426        |
| Digestive diseases      | Neurological diseases   | Gastric acid reflux | Migraine                            | 21.244         | 1.822      | 1.491        | 2.213        |
| Neurological diseases   | Digestive diseases      | Migraine            | Gastric acid reflux                 | 11.529         | 1.821      | 1.491        | 2.212        |
| Digestive diseases      | Skin diseases           | Gastric acid reflux | Eczema                              | 19.749         | 1.801      | 1.543        | 2.097        |
| Skin diseases           | Digestive diseases      | Eczema              | Gastric acid reflux                 | 20.064         | 1.800      | 1.542        | 2.095        |
| Digestive diseases      | Cardiovascular diseases | Gastric acid reflux | Hypertension                        | 20.367         | 1.773      | 1.395        | 2.236        |
| Skin diseases           | Digestive diseases      | Herpes              | Gastritis                           | 23.232         | 1.736      | 1.444        | 2.079        |
| Digestive diseases      | Skin diseases           | Gastritis           | Herpes                              | 11.526         | 1.736      | 1.443        | 2.078        |
| Psychiatric conditions  | Skin diseases           | Depression          | Acne                                | 16.667         | 1.736      | 1.469        | 2.044        |
| Cardiovascular diseases | Digestive diseases      | Hypertension        | Gastric acid reflux                 | 7.771          | 1.712      | 1.349        | 2.158        |
| Psychiatric conditions  | Pulmonary diseases      | Depression          | Asthma                              | 16.683         | 1.710      | 1.402        | 2.072        |
| Digestive diseases      | Skin diseases           | Gastritis           | Eczema                              | 11.097         | 1.709      | 1.406        | 2.066        |
| Skin diseases           | Psychiatric conditions  | Acne                | Depression                          | 20.148         | 1.708      | 1.445        | 2.012        |
| Pulmonary diseases      | Psychiatric conditions  | Asthma              | Depression                          | 12.915         | 1.706      | 1.398        | 2.068        |
| Skin diseases           | Digestive diseases      | Eczema              | Gastritis                           | 19.865         | 1.706      | 1.403        | 2.062        |
| Digestive diseases      | Skin diseases           | Gastritis           | Acne                                | 9.890          | 1.664      | 1.361        | 2.021        |
| Skin diseases           | Digestive diseases      | Acne                | Gastritis                           | 18.182         | 1.650      | 1.350        | 2.004        |
| Pulmonary diseases      | Digestive diseases      | Asthma              | Gastric acid reflux                 | 11.975         | 1.548      | 1.281        | 1.860        |
| Digestive diseases      | Pulmonary diseases      | Gastric acid reflux | Asthma                              | 17.922         | 1.546      | 1.279        | 1.858        |
| Skin diseases           | Skin diseases           | Herpes              | Eczema                              | 20.564         | 1.532      | 1.319        | 1.774        |
| Skin diseases           | Skin diseases           | Eczema              | Herpes                              | 18.263         | 1.530      | 1.317        | 1.772        |

Abbreviations: CI = Confidence Interval; GAD = Generalized Anxiety Disorder; IBS = Irritable Bowel Syndrome; OCD = Obsessive-Compulsive Disorder; PTSD = Posttraumatic Stress Disorder; UTI = Urinary Tract Infection.
