# Supplementary material for: Sex Differences in Comorbidity Combinations in the Swedish Population
Source: MDPI journal article supplement (doi:10.3390/biom12070949), 2022-07-06
Supplement: s1 [file s1]

**Table S1.** Significantly elevated comorbidity combinations ( $p < 0.05/5724$ ) in female participants ( $N = 19876$ ) sorted by odds ratio.

| Group of Condition 1     | Group of Condition 2     | Condition 1 ...       | ... in individuals with Condition 2 | Prevalence (%) | Odds ratio | Lower 95%-CI | Upper 95%-CI |
|--------------------------|--------------------------|-----------------------|-------------------------------------|----------------|------------|--------------|--------------|
| Cardiovascular diseases  | Cardiovascular diseases  | Angina pectoris       | Myocardial infarction               | 45.455         | 394.135    | 65.704       | 2717.418     |
| Cardiovascular diseases  | Cardiovascular diseases  | Myocardial infarction | Angina pectoris                     | 20.833         | 293.828    | 51.485       | 1908.896     |
| Psychiatric conditions   | Psychiatric conditions   | Tourette's syndrome   | OCD                                 | 0.855          | 94.384     | 13.271       | 658.776      |
| Psychiatric conditions   | Psychiatric conditions   | OCD                   | Tourette's syndrome                 | 42.857         | 79.857     | 12.882       | 503.130      |
| Psychiatric conditions   | Psychiatric conditions   | Panic disorder        | Agoraphobia                         | 82.653         | 29.954     | 16.817       | 56.907       |
| Psychiatric conditions   | Psychiatric conditions   | Agoraphobia           | Panic disorder                      | 3.890          | 29.612     | 16.686       | 56.087       |
| Psychiatric conditions   | Psychiatric conditions   | Agoraphobia           | Social anxiety                      | 8.609          | 21.175     | 12.606       | 35.237       |
| Psychiatric conditions   | Psychiatric conditions   | Social anxiety        | Agoraphobia                         | 53.061         | 20.960     | 12.421       | 35.018       |
| Musculoskeletal diseases | Musculoskeletal diseases | Chronic shoulder pain | Chronic back pain                   | 34.055         | 16.074     | 13.510       | 19.117       |
| Musculoskeletal diseases | Musculoskeletal diseases | Chronic back pain     | Chronic shoulder pain               | 43.098         | 16.058     | 13.500       | 19.094       |
| Psychiatric conditions   | Psychiatric conditions   | Asperger's syndrome   | Depression                          | 0.876          | 14.354     | 5.705        | 43.681       |
| Psychiatric conditions   | Psychiatric conditions   | Agoraphobia           | GAD                                 | 3.507          | 14.024     | 8.443        | 23.754       |
| Psychiatric conditions   | Psychiatric conditions   | GAD                   | Agoraphobia                         | 69.388         | 13.801     | 8.271        | 23.485       |
| Psychiatric conditions   | Psychiatric conditions   | Depression            | Asperger's syndrome                 | 77.273         | 13.335     | 5.268        | 40.718       |
| Psychiatric conditions   | Psychiatric conditions   | Agoraphobia           | PTSD                                | 7.210          | 13.267     | 6.967        | 24.015       |
| Psychiatric conditions   | Psychiatric conditions   | PTSD                  | Agoraphobia                         | 23.469         | 13.259     | 6.953        | 24.031       |
| Psychiatric conditions   | Psychiatric conditions   | Agoraphobia           | Bipolar disease                     | 11.111         | 12.716     | 5.122        | 28.098       |
| Psychiatric conditions   | Psychiatric conditions   | Bipolar disease       | Agoraphobia                         | 14.286         | 12.575     | 5.062        | 27.792       |
| Psychiatric conditions   | Psychiatric conditions   | Depression            | GAD                                 | 68.231         | 11.942     | 10.545       | 13.542       |
| Psychiatric conditions   | Psychiatric conditions   | GAD                   | Depression                          | 34.098         | 11.876     | 10.489       | 13.464       |
| Psychiatric conditions   | Psychiatric conditions   | Social anxiety        | GAD                                 | 17.225         | 11.808     | 9.598        | 14.536       |
| Psychiatric conditions   | Psychiatric conditions   | GAD                   | Social anxiety                      | 55.298         | 11.767     | 9.563        | 14.490       |
| Psychiatric conditions   | Psychiatric conditions   | Panic disorder        | GAD                                 | 47.808         | 10.997     | 9.661        | 12.520       |
| Psychiatric conditions   | Psychiatric conditions   | GAD                   | Panic disorder                      | 44.524         | 10.986     | 9.653        | 12.505       |
| Psychiatric conditions   | Psychiatric conditions   | Social anxiety        | Depression                          | 11.211         | 10.674     | 8.606        | 13.316       |
| Psychiatric conditions   | Psychiatric conditions   | Depression            | Social anxiety                      | 72.020         | 10.627     | 8.568        | 13.259       |
| Psychiatric conditions   | Psychiatric conditions   | GAD                   | OCD                                 | 58.974         | 10.531     | 8.029        | 13.841       |
| Psychiatric conditions   | Psychiatric conditions   | OCD                   | GAD                                 | 10.676         | 10.524     | 8.024        | 13.831       |
| Endocrine diseases       | Cardiovascular diseases  | Diabetes              | Hyperlipidemia                      | 5.882          | 9.533      | 5.146        | 16.996       |
| Musculoskeletal diseases | Musculoskeletal diseases | Chronic shoulder pain | Fibromyalgia                        | 38.788         | 9.314      | 6.296        | 13.625       |
| Cardiovascular diseases  | Endocrine diseases       | Hyperlipidemia        | Diabetes                            | 22.857         | 9.199      | 4.965        | 16.451       |
| Psychiatric conditions   | Psychiatric conditions   | PTSD                  | Depression                          | 5.825          | 9.085      | 6.834        | 12.196       |
| Psychiatric conditions   | Psychiatric conditions   | Depression            | PTSD                                | 70.846         | 9.052      | 6.803        | 12.161       |
| Psychiatric conditions   | Psychiatric conditions   | Social anxiety        | OCD                                 | 26.211         | 8.991      | 6.390        | 12.476       |
| Psychiatric conditions   | Psychiatric conditions   | Asperger's syndrome   | Social anxiety                      | 2.318          | 8.839      | 3.310        | 21.250       |
| Psychiatric conditions   | Psychiatric conditions   | OCD                   | Social anxiety                      | 15.232         | 8.824      | 6.287        | 12.215       |
| Musculoskeletal diseases | Musculoskeletal diseases | Fibromyalgia          | Chronic shoulder pain               | 6.744          | 8.723      | 5.891        | 12.773       |
| Psychiatric conditions   | Psychiatric conditions   | Agoraphobia           | OCD                                 | 5.128          | 8.302      | 3.905        | 16.267       |
| Psychiatric conditions   | Psychiatric conditions   | OCD                   | Agoraphobia                         | 18.367         | 8.067      | 3.810        | 15.731       |
| Psychiatric conditions   | Psychiatric conditions   | Depression            | Burnout                             | 58.491         | 8.061      | 7.143        | 9.104        |
| Psychiatric conditions   | Psychiatric conditions   | Burnout               | Depression                          | 27.165         | 7.956      | 7.053        | 8.981        |
| Musculoskeletal diseases | Musculoskeletal diseases | Chronic back pain     | Fibromyalgia                        | 43.636         | 7.892      | 5.404        | 11.421       |
| Psychiatric conditions   | Psychiatric conditions   | Asperger's syndrome   | Panic disorder                      | 0.865          | 7.856      | 3.447        | 18.000       |
| Psychiatric conditions   | Psychiatric conditions   | Social anxiety        | Panic disorder                      | 13.785         | 7.712      | 6.279        | 9.463        |
| Psychiatric conditions   | Psychiatric conditions   | Panic disorder        | Social anxiety                      | 47.517         | 7.683      | 6.254        | 9.430        |
| Psychiatric conditions   | Psychiatric conditions   | Asperger's syndrome   | Burnout                             | 0.777          | 7.682      | 3.335        | 17.258       |
| Psychiatric conditions   | Psychiatric conditions   | Agoraphobia           | Depression                          | 1.830          | 7.631      | 4.580        | 13.135       |
| Psychiatric conditions   | Psychiatric conditions   | Panic disorder        | Asperger's syndrome                 | 40.909         | 7.582      | 3.300        | 17.474       |

| Group of Condition 1     | Group of Condition 2     | Condition 1 ...     | ... in individuals with Condition 2 | Prevalence (%) | Odds ratio | Lower 95%-CI | Upper 95%-CI |
|--------------------------|--------------------------|---------------------|-------------------------------------|----------------|------------|--------------|--------------|
| Psychiatric conditions   | Psychiatric conditions   | Bipolar disease     | Depression                          | 2.191          | 7.569      | 4.798        | 12.199       |
| Digestive diseases       | Digestive diseases       | Celiac disease      | Lactose intolerance                 | 7.463          | 7.516      | 5.759        | 9.772        |
| Psychiatric conditions   | Psychiatric conditions   | Depression          | Agoraphobia                         | 72.449         | 7.509      | 4.490        | 12.966       |
| Digestive diseases       | Digestive diseases       | Lactose intolerance | Celiac disease                      | 38.793         | 7.502      | 5.749        | 9.753        |
| Psychiatric conditions   | Psychiatric conditions   | Panic disorder      | Depression                          | 31.572         | 7.467      | 6.657        | 8.380        |
| Psychiatric conditions   | Psychiatric conditions   | Depression          | Bipolar disease                     | 67.460         | 7.459      | 4.727        | 12.027       |
| Psychiatric conditions   | Psychiatric conditions   | Depression          | Panic disorder                      | 58.838         | 7.455      | 6.646        | 8.367        |
| Psychiatric conditions   | Psychiatric conditions   | PTSD                | Panic disorder                      | 7.061          | 7.433      | 5.629        | 9.796        |
| Psychiatric conditions   | Psychiatric conditions   | Panic disorder      | PTSD                                | 46.082         | 7.396      | 5.600        | 9.750        |
| Musculoskeletal diseases | Musculoskeletal diseases | Fibromyalgia        | Chronic back pain                   | 5.995          | 7.268      | 4.961        | 10.550       |
| Psychiatric conditions   | Psychiatric conditions   | OCD                 | Panic disorder                      | 8.838          | 7.224      | 5.517        | 9.452        |
| Psychiatric conditions   | Psychiatric conditions   | Panic disorder      | OCD                                 | 52.422         | 7.223      | 5.510        | 9.459        |
| Psychiatric conditions   | Psychiatric conditions   | PTSD                | Social anxiety                      | 10.099         | 6.953      | 4.798        | 9.875        |
| Psychiatric conditions   | Psychiatric conditions   | Social anxiety      | PTSD                                | 19.122         | 6.862      | 4.726        | 9.763        |
| Psychiatric conditions   | Psychiatric conditions   | Asperger's syndrome | GAD                                 | 1.031          | 6.827      | 2.938        | 15.700       |
| Psychiatric conditions   | Psychiatric conditions   | Depression          | OCD                                 | 65.242         | 6.746      | 5.140        | 8.906        |
| Psychiatric conditions   | Psychiatric conditions   | OCD                 | PTSD                                | 10.031         | 6.704      | 4.157        | 10.411       |
| Psychiatric conditions   | Psychiatric conditions   | OCD                 | Depression                          | 5.902          | 6.698      | 5.110        | 8.831        |
| Psychiatric conditions   | Psychiatric conditions   | PTSD                | OCD                                 | 9.117          | 6.676      | 4.112        | 10.445       |
| Psychiatric conditions   | Psychiatric conditions   | PTSD                | GAD                                 | 7.272          | 6.536      | 4.908        | 8.670        |
| Psychiatric conditions   | Psychiatric conditions   | GAD                 | PTSD                                | 44.201         | 6.461      | 4.847        | 8.579        |
| Psychiatric conditions   | Psychiatric conditions   | Bipolar disease     | GAD                                 | 3.094          | 6.345      | 3.980        | 10.031       |
| Psychiatric conditions   | Psychiatric conditions   | GAD                 | Bipolar disease                     | 47.619         | 6.272      | 3.952        | 9.872        |
| Psychiatric conditions   | Psychiatric conditions   | Bipolar disease     | Social anxiety                      | 4.305          | 6.137      | 3.340        | 10.658       |
| Psychiatric conditions   | Psychiatric conditions   | Social anxiety      | Bipolar disease                     | 20.635         | 6.071      | 3.293        | 10.573       |
| Psychiatric conditions   | Psychiatric conditions   | Agoraphobia         | Burnout                             | 2.164          | 6.026      | 3.609        | 9.905        |
| Psychiatric conditions   | Psychiatric conditions   | Burnout             | Agoraphobia                         | 39.796         | 5.918      | 3.527        | 9.778        |
| Digestive diseases       | Musculoskeletal diseases | Celiac disease      | Fibromyalgia                        | 6.061          | 5.860      | 2.683        | 11.341       |
| Musculoskeletal diseases | Digestive diseases       | Fibromyalgia        | Celiac disease                      | 2.874          | 5.646      | 2.574        | 10.996       |
| Psychiatric conditions   | Psychiatric conditions   | PTSD                | Burnout                             | 6.437          | 5.397      | 4.052        | 7.142        |
| Psychiatric conditions   | Psychiatric conditions   | Bipolar disease     | PTSD                                | 3.762          | 5.377      | 2.421        | 10.638       |
| Psychiatric conditions   | Psychiatric conditions   | Burnout             | GAD                                 | 26.044         | 5.322      | 4.601        | 6.149        |
| Psychiatric conditions   | Psychiatric conditions   | Burnout             | Panic disorder                      | 26.177         | 5.320      | 4.629        | 6.109        |
| Psychiatric conditions   | Psychiatric conditions   | Burnout             | PTSD                                | 36.364         | 5.295      | 3.972        | 7.014        |
| Psychiatric conditions   | Psychiatric conditions   | Panic disorder      | Burnout                             | 30.244         | 5.257      | 4.578        | 6.031        |
| Psychiatric conditions   | Psychiatric conditions   | GAD                 | Burnout                             | 28.024         | 5.178      | 4.483        | 5.975        |
| Psychiatric conditions   | Musculoskeletal diseases | GAD                 | Fibromyalgia                        | 27.273         | 5.002      | 3.216        | 7.633        |
| Psychiatric conditions   | Musculoskeletal diseases | PTSD                | Fibromyalgia                        | 9.091          | 4.940      | 2.331        | 9.418        |
| Digestive diseases       | Digestive diseases       | Gastric acid reflux | Gastritis                           | 36.342         | 4.922      | 4.456        | 5.437        |
| Digestive diseases       | Digestive diseases       | Gastritis           | Gastric acid reflux                 | 40.897         | 4.922      | 4.455        | 5.437        |
| Musculoskeletal diseases | Psychiatric conditions   | Fibromyalgia        | GAD                                 | 2.321          | 4.838      | 3.138        | 7.301        |
| Digestive diseases       | Psychiatric conditions   | Celiac disease      | PTSD                                | 6.270          | 4.824      | 2.729        | 7.969        |
| Psychiatric conditions   | Digestive diseases       | PTSD                | Celiac disease                      | 5.747          | 4.779      | 2.700        | 7.905        |
| Psychiatric conditions   | Psychiatric conditions   | Bipolar disease     | Panic disorder                      | 2.546          | 4.680      | 2.918        | 7.394        |
| Psychiatric conditions   | Psychiatric conditions   | Panic disorder      | Bipolar disease                     | 42.063         | 4.675      | 2.923        | 7.365        |
| Musculoskeletal diseases | Musculoskeletal diseases | Chronic back pain   | Sciatica                            | 22.175         | 4.608      | 3.847        | 5.501        |
| Musculoskeletal diseases | Musculoskeletal diseases | Sciatica            | Chronic back pain                   | 21.732         | 4.582      | 3.824        | 5.471        |
| Psychiatric conditions   | Musculoskeletal diseases | Depression          | Fibromyalgia                        | 49.697         | 4.534      | 3.140        | 6.544        |
| Digestive diseases       | Digestive diseases       | Stomach ulcer       | Gastritis                           | 4.075          | 4.532      | 3.414        | 6.008        |
| Digestive diseases       | Digestive diseases       | Gastritis           | Stomach ulcer                       | 47.368         | 4.524      | 3.408        | 5.998        |

| Group of Condition 1     | Group of Condition 2     | Condition 1 ...       | ... in individuals with Condition 2 | Prevalence (%) | Odds ratio | Lower 95%-CI | Upper 95%-CI |
|--------------------------|--------------------------|-----------------------|-------------------------------------|----------------|------------|--------------|--------------|
| Neurological diseases    | Digestive diseases       | Dyslexia              | Stomach ulcer                       | 9.825          | 4.378      | 2.655        | 6.868        |
| Digestive diseases       | Neurological diseases    | Stomach ulcer         | Dyslexia                            | 5.036          | 4.346      | 2.634        | 6.821        |
| Psychiatric conditions   | Musculoskeletal diseases | Burnout               | Fibromyalgia                        | 34.545         | 4.050      | 2.730        | 5.914        |
| Musculoskeletal diseases | Psychiatric conditions   | Fibromyalgia          | Depression                          | 2.113          | 3.991      | 2.781        | 5.719        |
| Psychiatric conditions   | Musculoskeletal diseases | Panic disorder        | Fibromyalgia                        | 27.879         | 3.968      | 2.577        | 5.986        |
| Digestive diseases       | Musculoskeletal diseases | IBS                   | Fibromyalgia                        | 29.091         | 3.821      | 2.510        | 5.690        |
| Digestive diseases       | Digestive diseases       | Gastric acid reflux   | Stomach ulcer                       | 39.298         | 3.780      | 2.821        | 5.037        |
| Musculoskeletal diseases | Digestive diseases       | Fibromyalgia          | IBS                                 | 2.674          | 3.769      | 2.480        | 5.600        |
| Digestive diseases       | Digestive diseases       | Stomach ulcer         | Gastric acid reflux                 | 3.804          | 3.759      | 2.804        | 5.010        |
| Musculoskeletal diseases | Psychiatric conditions   | Fibromyalgia          | Panic disorder                      | 2.209          | 3.744      | 2.443        | 5.614        |
| Psychiatric conditions   | Digestive diseases       | Agoraphobia           | IBS                                 | 1.671          | 3.677      | 2.096        | 6.197        |
| Cardiovascular diseases  | Cardiovascular diseases  | Hyperlipidemia        | Hypertension                        | 11.699         | 3.654      | 2.759        | 4.804        |
| Digestive diseases       | Digestive diseases       | Fecal incontinence    | IBS                                 | 1.670          | 3.629      | 2.114        | 5.983        |
| Cardiovascular diseases  | Cardiovascular diseases  | Hypertension          | Hyperlipidemia                      | 28.186         | 3.629      | 2.740        | 4.772        |
| Digestive diseases       | Digestive diseases       | IBS                   | Fecal incontinence                  | 28.037         | 3.620      | 2.109        | 5.971        |
| Digestive diseases       | Psychiatric conditions   | IBS                   | Agoraphobia                         | 30.612         | 3.550      | 2.018        | 5.999        |
| Musculoskeletal diseases | Psychiatric conditions   | Fibromyalgia          | Burnout                             | 3.163          | 3.457      | 2.322        | 5.065        |
| Psychiatric conditions   | Psychiatric conditions   | Social anxiety        | Burnout                             | 8.158          | 3.438      | 2.708        | 4.333        |
| Psychiatric conditions   | Psychiatric conditions   | Burnout               | Social anxiety                      | 24.338         | 3.423      | 2.692        | 4.320        |
| Digestive diseases       | Digestive diseases       | IBS                   | Lactose intolerance                 | 19.900         | 3.180      | 2.750        | 3.668        |
| Digestive diseases       | Digestive diseases       | Lactose intolerance   | IBS                                 | 20.045         | 3.163      | 2.735        | 3.649        |
| Psychiatric conditions   | Cardiovascular diseases  | PTSD                  | Cardiac arrhythmia                  | 5.214          | 3.135      | 1.863        | 4.983        |
| Cardiovascular diseases  | Psychiatric conditions   | Cardiac arrhythmia    | PTSD                                | 8.777          | 3.096      | 1.837        | 4.931        |
| Musculoskeletal diseases | Musculoskeletal diseases | Chronic shoulder pain | Sciatica                            | 13.509         | 3.034      | 2.439        | 3.747        |
| Musculoskeletal diseases | Musculoskeletal diseases | Sciatica              | Chronic shoulder pain               | 16.754         | 3.019      | 2.428        | 3.728        |
| Psychiatric conditions   | Psychiatric conditions   | Burnout               | OCD                                 | 21.368         | 2.977      | 2.111        | 4.123        |
| Digestive diseases       | Digestive diseases       | Lactose intolerance   | Stomach ulcer                       | 24.561         | 2.959      | 2.083        | 4.124        |
| Digestive diseases       | Musculoskeletal diseases | Stomach ulcer         | Chronic shoulder pain               | 4.215          | 2.958      | 1.901        | 4.432        |
| Psychiatric conditions   | Neurological diseases    | Social anxiety        | Bothersome tinnitus                 | 6.122          | 2.955      | 1.825        | 4.557        |
| Digestive diseases       | Digestive diseases       | Stomach ulcer         | Lactose intolerance                 | 3.870          | 2.951      | 2.077        | 4.113        |
| Pulmonary diseases       | Musculoskeletal diseases | Asthma                | Fibromyalgia                        | 20.000         | 2.937      | 1.869        | 4.479        |
| Psychiatric conditions   | Musculoskeletal diseases | Burnout               | Chronic shoulder pain               | 22.972         | 2.921      | 2.408        | 3.524        |
| Musculoskeletal diseases | Digestive diseases       | Chronic shoulder pain | Stomach ulcer                       | 14.035         | 2.919      | 1.875        | 4.376        |
| Musculoskeletal diseases | Neurological diseases    | Chronic shoulder pain | Bothersome tinnitus                 | 14.031         | 2.897      | 2.012        | 4.070        |
| Musculoskeletal diseases | Psychiatric conditions   | Chronic shoulder pain | Burnout                             | 12.098         | 2.888      | 2.379        | 3.488        |
| Neurological diseases    | Musculoskeletal diseases | Bothersome tinnitus   | Chronic shoulder pain               | 5.796          | 2.880      | 1.999        | 4.048        |
| Neurological diseases    | Psychiatric conditions   | Bothersome tinnitus   | Social anxiety                      | 3.974          | 2.849      | 1.758        | 4.397        |
| Psychiatric conditions   | Psychiatric conditions   | OCD                   | Burnout                             | 4.162          | 2.832      | 2.016        | 3.905        |
| Psychiatric conditions   | Digestive diseases       | PTSD                  | Lactose intolerance                 | 3.927          | 2.792      | 1.995        | 3.836        |
| Musculoskeletal diseases | Pulmonary diseases       | Fibromyalgia          | Asthma                              | 1.630          | 2.762      | 1.763        | 4.195        |
| Digestive diseases       | Psychiatric conditions   | Lactose intolerance   | PTSD                                | 22.257         | 2.758      | 1.970        | 3.793        |
| Cardiovascular diseases  | Neurological diseases    | Cardiac arrhythmia    | Bothersome tinnitus                 | 8.418          | 2.754      | 1.730        | 4.193        |
| Neurological diseases    | Cardiovascular diseases  | Bothersome tinnitus   | Cardiac arrhythmia                  | 6.134          | 2.742      | 1.723        | 4.175        |
| Psychiatric conditions   | Digestive diseases       | Burnout               | Celiac disease                      | 18.391         | 2.726      | 1.953        | 3.735        |
| Digestive diseases       | Psychiatric conditions   | Celiac disease        | Burnout                             | 3.552          | 2.720      | 1.950        | 3.725        |
| Digestive diseases       | Musculoskeletal diseases | Stomach ulcer         | Chronic back pain                   | 3.497          | 2.690      | 1.779        | 3.937        |
| Digestive diseases       | Urogenital diseases      | Gallbladder problems  | Recurring UTI                       | 3.915          | 2.665      | 1.991        | 3.517        |
| Skin diseases            | Pulmonary diseases       | Eczema                | Asthma                              | 33.893         | 2.665      | 2.375        | 2.987        |
| Pulmonary diseases       | Skin diseases            | Asthma                | Eczema                              | 19.189         | 2.664      | 2.374        | 2.987        |
| Urogenital diseases      | Digestive diseases       | Recurring UTI         | Gallbladder problems                | 19.395         | 2.658      | 1.986        | 3.507        |

| Group of Condition 1     | Group of Condition 2     | Condition 1 ...       | ... in individuals with Condition 2 | Prevalence (%) | Odds ratio | Lower 95%-CI | Upper 95%-CI |
|--------------------------|--------------------------|-----------------------|-------------------------------------|----------------|------------|--------------|--------------|
| Musculoskeletal diseases | Digestive diseases       | Chronic back pain     | Stomach ulcer                       | 14.737         | 2.657      | 1.756        | 3.894        |
| Digestive diseases       | Digestive diseases       | IBS                   | Celiac disease                      | 20.977         | 2.653      | 1.924        | 3.594        |
| Digestive diseases       | Digestive diseases       | Celiac disease        | IBS                                 | 4.065          | 2.650      | 1.922        | 3.591        |
| Digestive diseases       | Digestive diseases       | Gastric acid reflux   | Gallbladder problems                | 32.242         | 2.630      | 2.053        | 3.346        |
| Digestive diseases       | Digestive diseases       | Gallbladder problems  | Gastric acid reflux                 | 4.348          | 2.620      | 2.046        | 3.332        |
| Digestive diseases       | Digestive diseases       | IBS                   | Gastritis                           | 17.326         | 2.609      | 2.309        | 2.944        |
| Digestive diseases       | Digestive diseases       | Gastritis             | IBS                                 | 31.960         | 2.605      | 2.305        | 2.939        |
| Musculoskeletal diseases | Cardiovascular diseases  | Chronic shoulder pain | Cardiac arrhythmia                  | 11.173         | 2.542      | 1.824        | 3.467        |
| Cardiovascular diseases  | Musculoskeletal diseases | Cardiac arrhythmia    | Chronic shoulder pain               | 6.322          | 2.535      | 1.819        | 3.459        |
| Psychiatric conditions   | Musculoskeletal diseases | GAD                   | Chronic shoulder pain               | 20.548         | 2.523      | 2.043        | 3.097        |
| Musculoskeletal diseases | Psychiatric conditions   | Chronic shoulder pain | GAD                                 | 10.057         | 2.517      | 2.037        | 3.091        |
| Psychiatric conditions   | Cardiovascular diseases  | GAD                   | Cardiac arrhythmia                  | 18.436         | 2.497      | 1.884        | 3.266        |
| Cardiovascular diseases  | Psychiatric conditions   | Cardiac arrhythmia    | GAD                                 | 5.106          | 2.495      | 1.884        | 3.261        |
| Digestive diseases       | Psychiatric conditions   | Stomach ulcer         | Burnout                             | 3.385          | 2.494      | 1.729        | 3.519        |
| Psychiatric conditions   | Musculoskeletal diseases | Social anxiety        | Sciatica                            | 5.607          | 2.488      | 1.818        | 3.342        |
| Psychiatric conditions   | Digestive diseases       | Burnout               | Stomach ulcer                       | 21.404         | 2.482      | 1.721        | 3.500        |
| Psychiatric conditions   | Musculoskeletal diseases | PTSD                  | Chronic back pain                   | 4.163          | 2.469      | 1.666        | 3.554        |
| Psychiatric conditions   | Musculoskeletal diseases | Depression            | Chronic shoulder pain               | 36.038         | 2.464      | 2.087        | 2.903        |
| Psychiatric conditions   | Musculoskeletal diseases | Social anxiety        | Chronic shoulder pain               | 6.428          | 2.430      | 1.728        | 3.338        |
| Digestive diseases       | Digestive diseases       | IBS                   | Gastric acid reflux                 | 16.780         | 2.428      | 2.133        | 2.758        |
| Musculoskeletal diseases | Psychiatric conditions   | Sciatica              | Social anxiety                      | 10.927         | 2.426      | 1.769        | 3.267        |
| Digestive diseases       | Digestive diseases       | Gastric acid reflux   | IBS                                 | 27.506         | 2.426      | 2.132        | 2.756        |
| Digestive diseases       | Musculoskeletal diseases | Gallbladder problems  | Chronic shoulder pain               | 4.953          | 2.418      | 1.670        | 3.407        |
| Musculoskeletal diseases | Psychiatric conditions   | Chronic shoulder pain | Depression                          | 8.814          | 2.416      | 2.046        | 2.846        |
| Musculoskeletal diseases | Digestive diseases       | Chronic shoulder pain | Gallbladder problems                | 11.839         | 2.408      | 1.664        | 3.393        |
| Musculoskeletal diseases | Psychiatric conditions   | Chronic back pain     | PTSD                                | 15.674         | 2.405      | 1.620        | 3.466        |
| Digestive diseases       | Digestive diseases       | Gallbladder problems  | Gastritis                           | 3.682          | 2.405      | 1.880        | 3.057        |
| Digestive diseases       | Digestive diseases       | Gastritis             | Gallbladder problems                | 30.730         | 2.397      | 1.872        | 3.048        |
| Musculoskeletal diseases | Psychiatric conditions   | Chronic shoulder pain | Social anxiety                      | 10.099         | 2.392      | 1.699        | 3.290        |
| Psychiatric conditions   | Digestive diseases       | PTSD                  | Gastritis                           | 3.231          | 2.359      | 1.772        | 3.113        |
| Digestive diseases       | Psychiatric conditions   | Gastritis             | PTSD                                | 33.542         | 2.334      | 1.753        | 3.082        |
| Musculoskeletal diseases | Psychiatric conditions   | Chronic back pain     | GAD                                 | 11.707         | 2.329      | 1.921        | 2.808        |
| Psychiatric conditions   | Musculoskeletal diseases | GAD                   | Chronic back pain                   | 18.901         | 2.329      | 1.923        | 2.807        |
| Psychiatric conditions   | Digestive diseases       | Depression            | Gastritis                           | 32.005         | 2.307      | 2.094        | 2.541        |
| Digestive diseases       | Psychiatric conditions   | Gastritis             | Depression                          | 27.320         | 2.307      | 2.094        | 2.541        |
| Psychiatric conditions   | Musculoskeletal diseases | Burnout               | Chronic back pain                   | 19.234         | 2.306      | 1.923        | 2.753        |
| Digestive diseases       | Digestive diseases       | IBS                   | Stomach ulcer                       | 20.702         | 2.298      | 1.583        | 3.252        |
| Cardiovascular diseases  | Musculoskeletal diseases | Cardiac arrhythmia    | Chronic back pain                   | 5.912          | 2.291      | 1.687        | 3.056        |
| Musculoskeletal diseases | Cardiovascular diseases  | Chronic back pain     | Cardiac arrhythmia                  | 13.222         | 2.290      | 1.689        | 3.052        |
| Digestive diseases       | Psychiatric conditions   | Gastritis             | Burnout                             | 29.079         | 2.289      | 2.014        | 2.597        |
| Digestive diseases       | Psychiatric conditions   | Gastritis             | Panic disorder                      | 29.827         | 2.287      | 2.024        | 2.581        |
| Musculoskeletal diseases | Psychiatric conditions   | Chronic back pain     | Burnout                             | 12.819         | 2.283      | 1.903        | 2.727        |
| Digestive diseases       | Digestive diseases       | Stomach ulcer         | IBS                                 | 3.285          | 2.282      | 1.572        | 3.231        |
| Psychiatric conditions   | Digestive diseases       | Burnout               | Gastritis                           | 15.821         | 2.279      | 2.005        | 2.586        |
| Psychiatric conditions   | Digestive diseases       | Panic disorder        | Gastritis                           | 18.750         | 2.278      | 2.016        | 2.571        |
| Urogenital diseases      | Digestive diseases       | Recurring UTI         | Stomach ulcer                       | 20.351         | 2.276      | 1.584        | 3.199        |
| Digestive diseases       | Psychiatric conditions   | IBS                   | Panic disorder                      | 16.330         | 2.273      | 1.953        | 2.636        |
| Digestive diseases       | Psychiatric conditions   | Gastritis             | GAD                                 | 30.015         | 2.273      | 2.002        | 2.577        |
| Digestive diseases       | Urogenital diseases      | Stomach ulcer         | Recurring UTI                       | 2.949          | 2.269      | 1.578        | 3.190        |
| Urogenital diseases      | Digestive diseases       | Recurring UTI         | Gastritis                           | 17.688         | 2.265      | 2.006        | 2.554        |

| Group of Condition 1     | Group of Condition 2     | Condition 1 ...       | ... in individuals with Condition 2 | Prevalence (%) | Odds ratio | Lower 95%-CI | Upper 95%-CI |
|--------------------------|--------------------------|-----------------------|-------------------------------------|----------------|------------|--------------|--------------|
| Digestive diseases       | Musculoskeletal diseases | IBS                   | Chronic shoulder pain               | 17.703         | 2.263      | 1.838        | 2.766        |
| Psychiatric conditions   | Musculoskeletal diseases | Social anxiety        | Chronic back pain                   | 6.162          | 2.262      | 1.656        | 3.031        |
| Psychiatric conditions   | Digestive diseases       | Panic disorder        | IBS                                 | 18.942         | 2.260      | 1.942        | 2.622        |
| Digestive diseases       | Urogenital diseases      | Gastritis             | Recurring UTI                       | 29.792         | 2.259      | 2.001        | 2.547        |
| Digestive diseases       | Musculoskeletal diseases | Gallbladder problems  | Sciatica                            | 5.268          | 2.255      | 1.631        | 3.061        |
| Psychiatric conditions   | Digestive diseases       | GAD                   | Gastritis                           | 17.572         | 2.255      | 1.986        | 2.556        |
| Musculoskeletal diseases | Digestive diseases       | Chronic shoulder pain | IBS                                 | 9.359          | 2.253      | 1.830        | 2.754        |
| Psychiatric conditions   | Neurological diseases    | Burnout               | Bothersome tinnitus                 | 19.643         | 2.252      | 1.658        | 3.013        |
| Psychiatric conditions   | Musculoskeletal diseases | Depression            | Chronic back pain                   | 34.804         | 2.243      | 1.932        | 2.599        |
| Psychiatric conditions   | Cardiovascular diseases  | Panic disorder        | Cardiac arrhythmia                  | 18.436         | 2.238      | 1.700        | 2.909        |
| Cardiovascular diseases  | Psychiatric conditions   | Cardiac arrhythmia    | Panic disorder                      | 4.755          | 2.237      | 1.698        | 2.908        |
| Digestive diseases       | Psychiatric conditions   | IBS                   | Depression                          | 15.335         | 2.234      | 1.978        | 2.521        |
| Musculoskeletal diseases | Psychiatric conditions   | Chronic back pain     | Social anxiety                      | 12.252         | 2.233      | 1.633        | 2.996        |
| Psychiatric conditions   | Digestive diseases       | Depression            | IBS                                 | 33.148         | 2.228      | 1.972        | 2.515        |
| Neurological diseases    | Musculoskeletal diseases | Migraine              | Chronic shoulder pain               | 27.713         | 2.216      | 1.861        | 2.630        |
| Musculoskeletal diseases | Psychiatric conditions   | Chronic back pain     | Depression                          | 10.773         | 2.214      | 1.907        | 2.564        |
| Digestive diseases       | Psychiatric conditions   | Gastric acid reflux   | Panic disorder                      | 26.945         | 2.212      | 1.945        | 2.511        |
| Psychiatric conditions   | Digestive diseases       | Panic disorder        | Gastric acid reflux                 | 19.069         | 2.210      | 1.944        | 2.509        |
| Musculoskeletal diseases | Digestive diseases       | Sciatica              | Gallbladder problems                | 15.617         | 2.208      | 1.594        | 3.003        |
| Musculoskeletal diseases | Neurological diseases    | Chronic shoulder pain | Migraine                            | 8.302          | 2.206      | 1.852        | 2.618        |
| Digestive diseases       | Digestive diseases       | Gallbladder problems  | IBS                                 | 3.842          | 2.205      | 1.620        | 2.949        |
| Psychiatric conditions   | Pulmonary diseases       | PTSD                  | Asthma                              | 3.014          | 2.197      | 1.552        | 3.045        |
| Digestive diseases       | Digestive diseases       | IBS                   | Gallbladder problems                | 17.380         | 2.196      | 1.614        | 2.936        |
| Pulmonary diseases       | Psychiatric conditions   | Asthma                | PTSD                                | 19.122         | 2.180      | 1.539        | 3.023        |
| Neurological diseases    | Psychiatric conditions   | Bothersome tinnitus   | Burnout                             | 4.273          | 2.172      | 1.595        | 2.913        |
| Digestive diseases       | Psychiatric conditions   | IBS                   | Burnout                             | 15.816         | 2.139      | 1.825        | 2.497        |
| Musculoskeletal diseases | Musculoskeletal diseases | Chronic back pain     | Osteoarthritis                      | 14.106         | 2.138      | 1.649        | 2.747        |
| Psychiatric conditions   | Digestive diseases       | Burnout               | IBS                                 | 15.877         | 2.127      | 1.815        | 2.485        |
| Digestive diseases       | Musculoskeletal diseases | Gastritis             | Chronic shoulder pain               | 28.451         | 2.126      | 1.787        | 2.520        |
| Digestive diseases       | Psychiatric conditions   | IBS                   | GAD                                 | 15.678         | 2.121      | 1.809        | 2.479        |
| Psychiatric conditions   | Skin diseases            | PTSD                  | Acne                                | 2.658          | 2.117      | 1.545        | 2.862        |
| Musculoskeletal diseases | Digestive diseases       | Chronic shoulder pain | Gastritis                           | 8.152          | 2.112      | 1.776        | 2.504        |
| Psychiatric conditions   | Digestive diseases       | GAD                   | IBS                                 | 16.936         | 2.103      | 1.793        | 2.458        |
| Psychiatric conditions   | Digestive diseases       | OCD                   | Gastric acid reflux                 | 3.331          | 2.101      | 1.559        | 2.800        |
| Digestive diseases       | Psychiatric conditions   | Gastric acid reflux   | OCD                                 | 27.920         | 2.099      | 1.557        | 2.799        |
| Musculoskeletal diseases | Psychiatric conditions   | Sciatica              | GAD                                 | 9.283          | 2.099      | 1.709        | 2.560        |
| Neurological diseases    | Psychiatric conditions   | Dyslexia              | Burnout                             | 5.105          | 2.098      | 1.565        | 2.769        |
| Psychiatric conditions   | Musculoskeletal diseases | GAD                   | Sciatica                            | 15.293         | 2.098      | 1.710        | 2.558        |
| Psychiatric conditions   | Neurological diseases    | Burnout               | Dyslexia                            | 16.547         | 2.093      | 1.560        | 2.764        |
| Digestive diseases       | Cardiovascular diseases  | Lactose intolerance   | Cardiac arrhythmia                  | 13.383         | 2.078      | 1.558        | 2.729        |
| Cardiovascular diseases  | Digestive diseases       | Cardiac arrhythmia    | Lactose intolerance                 | 3.980          | 2.074      | 1.555        | 2.724        |
| Skin diseases            | Psychiatric conditions   | Acne                  | PTSD                                | 25.392         | 2.074      | 1.510        | 2.810        |
| Digestive diseases       | Cardiovascular diseases  | Gastritis             | Cardiac arrhythmia                  | 27.881         | 2.061      | 1.644        | 2.568        |
| Psychiatric conditions   | Neurological diseases    | Depression            | Bothersome tinnitus                 | 31.633         | 2.048      | 1.580        | 2.637        |
| Digestive diseases       | Musculoskeletal diseases | Gastritis             | Chronic back pain                   | 26.145         | 2.046      | 1.752        | 2.384        |
| Digestive diseases       | Psychiatric conditions   | Gastric acid reflux   | PTSD                                | 27.586         | 2.045      | 1.506        | 2.742        |
| Pulmonary diseases       | Musculoskeletal diseases | Asthma                | Chronic shoulder pain               | 17.808         | 2.039      | 1.654        | 2.495        |
| Musculoskeletal diseases | Digestive diseases       | Chronic back pain     | Gastritis                           | 9.481          | 2.035      | 1.742        | 2.371        |
| Psychiatric conditions   | Digestive diseases       | PTSD                  | Gastric acid reflux                 | 2.991          | 2.029      | 1.494        | 2.720        |
| Cardiovascular diseases  | Digestive diseases       | Cardiac arrhythmia    | Gastritis                           | 4.528          | 2.028      | 1.618        | 2.525        |

| Group of Condition 1     | Group of Condition 2     | Condition 1 ...       | ... in individuals with Condition 2 | Prevalence (%) | Odds ratio | Lower 95%-CI | Upper 95%-CI |
|--------------------------|--------------------------|-----------------------|-------------------------------------|----------------|------------|--------------|--------------|
| Musculoskeletal diseases | Pulmonary diseases       | Chronic shoulder pain | Asthma                              | 8.350          | 2.027      | 1.644        | 2.481        |
| Psychiatric conditions   | Musculoskeletal diseases | Panic disorder        | Chronic back pain                   | 18.651         | 2.022      | 1.673        | 2.430        |
| Psychiatric conditions   | Digestive diseases       | Depression            | Stomach ulcer                       | 37.544         | 2.018      | 1.486        | 2.717        |
| Digestive diseases       | Psychiatric conditions   | Stomach ulcer         | Depression                          | 2.758          | 2.017      | 1.486        | 2.715        |
| Psychiatric conditions   | Musculoskeletal diseases | Panic disorder        | Sciatica                            | 16.568         | 2.011      | 1.656        | 2.429        |
| Digestive diseases       | Musculoskeletal diseases | IBS                   | Chronic back pain                   | 15.987         | 2.009      | 1.660        | 2.417        |
| Musculoskeletal diseases | Digestive diseases       | Chronic back pain     | IBS                                 | 10.696         | 2.006      | 1.657        | 2.413        |
| Musculoskeletal diseases | Psychiatric conditions   | Chronic back pain     | Panic disorder                      | 10.759         | 2.003      | 1.656        | 2.408        |
| Neurological diseases    | Psychiatric conditions   | Bothersome tinnitus   | Depression                          | 3.196          | 1.997      | 1.541        | 2.571        |
| Psychiatric conditions   | Cardiovascular diseases  | Depression            | Cardiac arrhythmia                  | 32.216         | 1.995      | 1.598        | 2.477        |
| Musculoskeletal diseases | Psychiatric conditions   | Sciatica              | Panic disorder                      | 9.366          | 1.990      | 1.637        | 2.405        |
| Psychiatric conditions   | Musculoskeletal diseases | Panic disorder        | Chronic shoulder pain               | 19.705         | 1.988      | 1.605        | 2.443        |
| Digestive diseases       | Psychiatric conditions   | Celiac disease        | Depression                          | 2.835          | 1.988      | 1.501        | 2.610        |
| Psychiatric conditions   | Cardiovascular diseases  | Burnout               | Cardiac arrhythmia                  | 19.181         | 1.987      | 1.514        | 2.573        |
| Neurological diseases    | Cardiovascular diseases  | Migraine              | Cardiac arrhythmia                  | 26.443         | 1.982      | 1.574        | 2.476        |
| Psychiatric conditions   | Digestive diseases       | Depression            | Celiac disease                      | 31.609         | 1.977      | 1.491        | 2.598        |
| Cardiovascular diseases  | Psychiatric conditions   | Cardiac arrhythmia    | Depression                          | 4.459          | 1.972      | 1.581        | 2.446        |
| Musculoskeletal diseases | Psychiatric conditions   | Chronic shoulder pain | Panic disorder                      | 8.982          | 1.971      | 1.591        | 2.424        |
| Cardiovascular diseases  | Neurological diseases    | Cardiac arrhythmia    | Migraine                            | 4.482          | 1.969      | 1.565        | 2.461        |
| Musculoskeletal diseases | Musculoskeletal diseases | Chronic shoulder pain | Osteoarthritis                      | 10.665         | 1.965      | 1.461        | 2.609        |
| Digestive diseases       | Psychiatric conditions   | Gastric acid reflux   | GAD                                 | 26.044         | 1.957      | 1.708        | 2.238        |
| Psychiatric conditions   | Digestive diseases       | GAD                   | Gastric acid reflux                 | 17.165         | 1.954      | 1.705        | 2.234        |
| Psychiatric conditions   | Musculoskeletal diseases | Depression            | Sciatica                            | 30.246         | 1.939      | 1.663        | 2.254        |
| Cardiovascular diseases  | Psychiatric conditions   | Cardiac arrhythmia    | Burnout                             | 5.716          | 1.930      | 1.468        | 2.503        |
| Psychiatric conditions   | Musculoskeletal diseases | Burnout               | Sciatica                            | 17.247         | 1.922      | 1.596        | 2.301        |
| Pulmonary diseases       | Musculoskeletal diseases | Asthma                | Chronic back pain                   | 16.903         | 1.920      | 1.589        | 2.305        |
| Pulmonary diseases       | Digestive diseases       | Asthma                | Lactose intolerance                 | 16.750         | 1.919      | 1.644        | 2.233        |
| Digestive diseases       | Pulmonary diseases       | Lactose intolerance   | Asthma                              | 14.970         | 1.917      | 1.642        | 2.230        |
| Digestive diseases       | Cardiovascular diseases  | Gastric acid reflux   | Cardiac arrhythmia                  | 24.721         | 1.907      | 1.502        | 2.402        |
| Musculoskeletal diseases | Pulmonary diseases       | Chronic back pain     | Asthma                              | 10.030         | 1.906      | 1.577        | 2.289        |
| Digestive diseases       | Musculoskeletal diseases | Gastric acid reflux   | Chronic back pain                   | 24.729         | 1.905      | 1.617        | 2.236        |
| Digestive diseases       | Musculoskeletal diseases | Gastritis             | Sciatica                            | 24.809         | 1.903      | 1.625        | 2.222        |
| Digestive diseases       | Psychiatric conditions   | Gastric acid reflux   | Social anxiety                      | 26.987         | 1.898      | 1.508        | 2.372        |
| Psychiatric conditions   | Digestive diseases       | Social anxiety        | Gastric acid reflux                 | 5.540          | 1.898      | 1.508        | 2.372        |
| Digestive diseases       | Musculoskeletal diseases | Gastric acid reflux   | Chronic shoulder pain               | 26.765         | 1.898      | 1.578        | 2.272        |
| Digestive diseases       | Psychiatric conditions   | IBS                   | Social anxiety                      | 16.556         | 1.896      | 1.442        | 2.458        |
| Cardiovascular diseases  | Digestive diseases       | Cardiac arrhythmia    | Gastric acid reflux                 | 4.518          | 1.894      | 1.491        | 2.386        |
| Psychiatric conditions   | Digestive diseases       | Panic disorder        | Lactose intolerance                 | 17.644         | 1.890      | 1.614        | 2.206        |
| Musculoskeletal diseases | Digestive diseases       | Chronic back pain     | Gastric acid reflux                 | 10.095         | 1.888      | 1.602        | 2.217        |
| Psychiatric conditions   | Digestive diseases       | Burnout               | Lactose intolerance                 | 13.993         | 1.885      | 1.588        | 2.227        |
| Digestive diseases       | Psychiatric conditions   | Gastric acid reflux   | Depression                          | 23.119         | 1.885      | 1.699        | 2.090        |
| Psychiatric conditions   | Digestive diseases       | Depression            | Gastric acid reflux                 | 30.489         | 1.881      | 1.696        | 2.086        |
| Musculoskeletal diseases | Digestive diseases       | Chronic shoulder pain | Gastric acid reflux                 | 8.634          | 1.880      | 1.563        | 2.250        |
| Psychiatric conditions   | Digestive diseases       | Social anxiety        | IBS                                 | 5.571          | 1.879      | 1.429        | 2.437        |
| Musculoskeletal diseases | Psychiatric conditions   | Sciatica              | Depression                          | 9.175          | 1.878      | 1.611        | 2.183        |
| Digestive diseases       | Psychiatric conditions   | Lactose intolerance   | Panic disorder                      | 15.322         | 1.876      | 1.602        | 2.190        |
| Digestive diseases       | Psychiatric conditions   | Lactose intolerance   | Burnout                             | 14.040         | 1.868      | 1.574        | 2.206        |
| Musculoskeletal diseases | Digestive diseases       | Sciatica              | Gastritis                           | 8.816          | 1.868      | 1.595        | 2.180        |
| Musculoskeletal diseases | Musculoskeletal diseases | Osteoarthritis        | Chronic back pain                   | 10.241         | 1.865      | 1.440        | 2.395        |
| Musculoskeletal diseases | Psychiatric conditions   | Sciatica              | Burnout                             | 11.265         | 1.864      | 1.547        | 2.234        |

| Group of Condition 1     | Group of Condition 2     | Condition 1 ...       | ... in individuals with Condition 2 | Prevalence (%) | Odds ratio | Lower 95%-CI | Upper 95%-CI |
|--------------------------|--------------------------|-----------------------|-------------------------------------|----------------|------------|--------------|--------------|
| Musculoskeletal diseases | Cardiovascular diseases  | Chronic shoulder pain | Hypertension                        | 9.572          | 1.856      | 1.416        | 2.401        |
| Digestive diseases       | Musculoskeletal diseases | Gastric acid reflux   | Sciatica                            | 23.619         | 1.845      | 1.565        | 2.167        |
| Urogenital diseases      | Skin diseases            | Recurring UTI         | Acne                                | 15.087         | 1.845      | 1.619        | 2.098        |
| Skin diseases            | Urogenital diseases      | Acne                  | Recurring UTI                       | 23.386         | 1.840      | 1.615        | 2.093        |
| Digestive diseases       | Endocrine diseases       | IBS                   | Thyroid disease                     | 14.581         | 1.832      | 1.487        | 2.239        |
| Psychiatric conditions   | Digestive diseases       | Depression            | Lactose intolerance                 | 29.978         | 1.822      | 1.604        | 2.066        |
| Musculoskeletal diseases | Digestive diseases       | Sciatica              | Gastric acid reflux                 | 9.449          | 1.822      | 1.545        | 2.140        |
| Endocrine diseases       | Digestive diseases       | Thyroid disease       | IBS                                 | 8.241          | 1.820      | 1.478        | 2.224        |
| Psychiatric conditions   | Neurological diseases    | Panic disorder        | Migraine                            | 16.319         | 1.820      | 1.598        | 2.069        |
| Musculoskeletal diseases | Musculoskeletal diseases | Sciatica              | Osteoarthritis                      | 15.826         | 1.817      | 1.426        | 2.300        |
| Neurological diseases    | Psychiatric conditions   | Migraine              | Panic disorder                      | 24.832         | 1.814      | 1.593        | 2.063        |
| Digestive diseases       | Skin diseases            | Gastric acid reflux   | Acne                                | 21.318         | 1.812      | 1.617        | 2.028        |
| Digestive diseases       | Psychiatric conditions   | Lactose intolerance   | Depression                          | 13.969         | 1.811      | 1.594        | 2.054        |
| Skin diseases            | Digestive diseases       | Acne                  | Gastric acid reflux                 | 22.079         | 1.804      | 1.610        | 2.019        |
| Digestive diseases       | Psychiatric conditions   | Gastric acid reflux   | Burnout                             | 22.697         | 1.782      | 1.551        | 2.042        |
| Digestive diseases       | Digestive diseases       | Gastritis             | Lactose intolerance                 | 26.479         | 1.781      | 1.561        | 2.028        |
| Digestive diseases       | Digestive diseases       | Gastric acid reflux   | Lactose intolerance                 | 22.222         | 1.777      | 1.546        | 2.036        |
| Digestive diseases       | Neurological diseases    | Gastritis             | Migraine                            | 24.179         | 1.775      | 1.598        | 1.970        |
| Neurological diseases    | Digestive diseases       | Migraine              | Gastritis                           | 23.128         | 1.774      | 1.597        | 1.969        |
| Digestive diseases       | Digestive diseases       | Lactose intolerance   | Gastric acid reflux                 | 13.655         | 1.772      | 1.543        | 2.031        |
| Psychiatric conditions   | Digestive diseases       | Burnout               | Gastric acid reflux                 | 13.902         | 1.772      | 1.542        | 2.031        |
| Digestive diseases       | Digestive diseases       | Lactose intolerance   | Gastritis                           | 14.458         | 1.772      | 1.553        | 2.018        |
| Psychiatric conditions   | Digestive diseases       | Social anxiety        | Gastritis                           | 4.891          | 1.767      | 1.413        | 2.195        |
| Musculoskeletal diseases | Digestive diseases       | Chronic shoulder pain | Lactose intolerance                 | 7.688          | 1.766      | 1.398        | 2.208        |
| Digestive diseases       | Psychiatric conditions   | Gastritis             | Social anxiety                      | 26.821         | 1.766      | 1.413        | 2.194        |
| Digestive diseases       | Musculoskeletal diseases | Lactose intolerance   | Chronic shoulder pain               | 14.647         | 1.763      | 1.395        | 2.204        |
| Endocrine diseases       | Digestive diseases       | Thyroid disease       | Lactose intolerance                 | 6.689          | 1.757      | 1.400        | 2.182        |
| Digestive diseases       | Endocrine diseases       | Lactose intolerance   | Thyroid disease                     | 11.921         | 1.754      | 1.399        | 2.179        |
| Digestive diseases       | Musculoskeletal diseases | IBS                   | Sciatica                            | 14.019         | 1.751      | 1.435        | 2.122        |
| Neurological diseases    | Musculoskeletal diseases | Migraine              | Sciatica                            | 24.554         | 1.742      | 1.480        | 2.043        |
| Urogenital diseases      | Digestive diseases       | Recurring UTI         | Gastric acid reflux                 | 15.149         | 1.741      | 1.523        | 1.986        |
| Musculoskeletal diseases | Digestive diseases       | Sciatica              | IBS                                 | 9.192          | 1.737      | 1.423        | 2.104        |
| Digestive diseases       | Urogenital diseases      | Gastric acid reflux   | Recurring UTI                       | 22.674         | 1.737      | 1.519        | 1.981        |
| Digestive diseases       | Skin diseases            | Gastritis             | Acne                                | 23.385         | 1.719      | 1.543        | 1.914        |
| Musculoskeletal diseases | Neurological diseases    | Sciatica              | Migraine                            | 9.122          | 1.718      | 1.460        | 2.015        |
| Psychiatric conditions   | Musculoskeletal diseases | Depression            | Osteoarthritis                      | 22.477         | 1.707      | 1.387        | 2.093        |
| Skin diseases            | Digestive diseases       | Acne                  | Gastritis                           | 21.521         | 1.702      | 1.527        | 1.895        |
| Digestive diseases       | Skin diseases            | Gastric acid reflux   | Eczema                              | 21.119         | 1.701      | 1.528        | 1.891        |
| Psychiatric conditions   | Skin diseases            | Social anxiety        | Acne                                | 4.989          | 1.699      | 1.340        | 2.136        |
| Neurological diseases    | Psychiatric conditions   | Migraine              | Burnout                             | 23.196         | 1.699      | 1.482        | 1.944        |
| Digestive diseases       | Pulmonary diseases       | Gastritis             | Asthma                              | 23.666         | 1.699      | 1.498        | 1.924        |
| Pulmonary diseases       | Digestive diseases       | Asthma                | Gastritis                           | 14.458         | 1.699      | 1.498        | 1.923        |
| Skin diseases            | Digestive diseases       | Eczema                | Gastric acid reflux                 | 25.645         | 1.699      | 1.527        | 1.889        |
| Psychiatric conditions   | Neurological diseases    | Burnout               | Migraine                            | 13.194         | 1.695      | 1.478        | 1.939        |
| Digestive diseases       | Neurological diseases    | Gastric acid reflux   | Migraine                            | 21.591         | 1.695      | 1.516        | 1.894        |
| Neurological diseases    | Digestive diseases       | Migraine              | Gastric acid reflux                 | 23.249         | 1.695      | 1.516        | 1.893        |
| Psychiatric conditions   | Digestive diseases       | GAD                   | Lactose intolerance                 | 16.095         | 1.680      | 1.422        | 1.977        |
| Digestive diseases       | Skin diseases            | Gastric acid reflux   | Herpes                              | 20.641         | 1.677      | 1.512        | 1.860        |
| Skin diseases            | Digestive diseases       | Herpes                | Gastric acid reflux                 | 26.698         | 1.676      | 1.511        | 1.859        |
| Digestive diseases       | Psychiatric conditions   | Lactose intolerance   | GAD                                 | 15.008         | 1.667      | 1.411        | 1.962        |

| Group of Condition 1     | Group of Condition 2     | Condition 1 ...     | ... in individuals with Condition 2 | Prevalence (%) | Odds ratio | Lower 95%-CI | Upper 95%-CI |
|--------------------------|--------------------------|---------------------|-------------------------------------|----------------|------------|--------------|--------------|
| Neurological diseases    | Musculoskeletal diseases | Migraine            | Chronic back pain                   | 23.897         | 1.665      | 1.412        | 1.956        |
| Musculoskeletal diseases | Neurological diseases    | Chronic back pain   | Migraine                            | 9.059          | 1.660      | 1.408        | 1.950        |
| Pulmonary diseases       | Musculoskeletal diseases | Asthma              | Sciatica                            | 13.254         | 1.657      | 1.359        | 2.007        |
| Digestive diseases       | Musculoskeletal diseases | Lactose intolerance | Sciatica                            | 11.555         | 1.657      | 1.335        | 2.040        |
| Musculoskeletal diseases | Digestive diseases       | Sciatica            | Lactose intolerance                 | 7.522          | 1.657      | 1.335        | 2.040        |
| Musculoskeletal diseases | Digestive diseases       | Chronic back pain   | Lactose intolerance                 | 9.292          | 1.656      | 1.341        | 2.027        |
| Digestive diseases       | Musculoskeletal diseases | Lactose intolerance | Chronic back pain                   | 13.988         | 1.653      | 1.339        | 2.024        |
| Musculoskeletal diseases | Pulmonary diseases       | Sciatica            | Asthma                              | 7.708          | 1.649      | 1.352        | 1.997        |
| Digestive diseases       | Skin diseases            | Gastritis           | Eczema                              | 22.993         | 1.638      | 1.479        | 1.813        |
| Skin diseases            | Digestive diseases       | Eczema              | Gastritis                           | 24.811         | 1.637      | 1.478        | 1.811        |
| Psychiatric conditions   | Neurological diseases    | Depression          | Migraine                            | 27.210         | 1.624      | 1.464        | 1.800        |
| Neurological diseases    | Psychiatric conditions   | Migraine            | Depression                          | 22.216         | 1.623      | 1.463        | 1.798        |
| Pulmonary diseases       | Psychiatric conditions   | Asthma              | Depression                          | 14.021         | 1.615      | 1.428        | 1.824        |
| Psychiatric conditions   | Pulmonary diseases       | Depression          | Asthma                              | 26.877         | 1.614      | 1.427        | 1.822        |
| Neurological diseases    | Digestive diseases       | Migraine            | Lactose intolerance                 | 22.124         | 1.606      | 1.399        | 1.839        |
| Digestive diseases       | Neurological diseases    | Lactose intolerance | Migraine                            | 12.626         | 1.602      | 1.395        | 1.834        |
| Psychiatric conditions   | Skin diseases            | Depression          | Acne                                | 26.715         | 1.597      | 1.436        | 1.775        |
| Digestive diseases       | Cardiovascular diseases  | Gastric acid reflux | Hypertension                        | 20.956         | 1.588      | 1.314        | 1.910        |
| Skin diseases            | Psychiatric conditions   | Acne                | Depression                          | 20.979         | 1.577      | 1.418        | 1.752        |
| Cardiovascular diseases  | Digestive diseases       | Hypertension        | Gastric acid reflux                 | 6.997          | 1.558      | 1.290        | 1.872        |
| Skin diseases            | Skin diseases            | Herpes              | Acne                                | 24.697         | 1.544      | 1.389        | 1.713        |
| Neurological diseases    | Cardiovascular diseases  | Migraine            | Hypertension                        | 22.301         | 1.538      | 1.275        | 1.845        |
| Urogenital diseases      | Psychiatric conditions   | Recurring UTI       | Panic disorder                      | 15.178         | 1.531      | 1.305        | 1.789        |
| Skin diseases            | Skin diseases            | Acne                | Herpes                              | 19.774         | 1.527      | 1.375        | 1.695        |
| Skin diseases            | Urogenital diseases      | Herpes              | Recurring UTI                       | 26.792         | 1.522      | 1.344        | 1.721        |
| Urogenital diseases      | Skin diseases            | Recurring UTI       | Herpes                              | 13.839         | 1.520      | 1.343        | 1.718        |
| Psychiatric conditions   | Urogenital diseases      | Panic disorder      | Recurring UTI                       | 16.073         | 1.518      | 1.293        | 1.774        |
| Skin diseases            | Skin diseases            | Eczema              | Acne                                | 24.434         | 1.507      | 1.354        | 1.675        |
| Skin diseases            | Skin diseases            | Acne                | Eczema                              | 20.839         | 1.505      | 1.352        | 1.673        |
| Skin diseases            | Urogenital diseases      | Eczema              | Recurring UTI                       | 24.555         | 1.501      | 1.321        | 1.703        |
| Urogenital diseases      | Skin diseases            | Recurring UTI       | Eczema                              | 13.510         | 1.501      | 1.321        | 1.703        |
| Digestive diseases       | Skin diseases            | IBS                 | Acne                                | 12.037         | 1.496      | 1.299        | 1.718        |
| Skin diseases            | Digestive diseases       | Acne                | IBS                                 | 20.434         | 1.493      | 1.296        | 1.714        |
| Digestive diseases       | Pulmonary diseases       | Gastric acid reflux | Asthma                              | 19.812         | 1.493      | 1.304        | 1.706        |
| Pulmonary diseases       | Digestive diseases       | Asthma              | Gastric acid reflux                 | 13.621         | 1.492      | 1.302        | 1.704        |
| Digestive diseases       | Skin diseases            | IBS                 | Eczema                              | 12.000         | 1.486      | 1.303        | 1.692        |
| Skin diseases            | Digestive diseases       | Eczema              | IBS                                 | 23.886         | 1.486      | 1.302        | 1.692        |
| Skin diseases            | Skin diseases            | Herpes              | Eczema                              | 24.895         | 1.486      | 1.347        | 1.638        |
| Skin diseases            | Digestive diseases       | Herpes              | Gastritis                           | 25.174         | 1.485      | 1.343        | 1.640        |
| Digestive diseases       | Skin diseases            | Gastritis           | Herpes                              | 21.901         | 1.485      | 1.343        | 1.640        |
| Skin diseases            | Skin diseases            | Eczema              | Herpes                              | 23.372         | 1.484      | 1.345        | 1.636        |
| Digestive diseases       | Pulmonary diseases       | IBS                 | Asthma                              | 12.204         | 1.480      | 1.255        | 1.738        |
| Pulmonary diseases       | Digestive diseases       | Asthma              | IBS                                 | 13.753         | 1.476      | 1.252        | 1.733        |
| Skin diseases            | Psychiatric conditions   | Acne                | GAD                                 | 22.073         | 1.475      | 1.281        | 1.694        |
| Psychiatric conditions   | Skin diseases            | GAD                 | Acne                                | 14.047         | 1.474      | 1.280        | 1.694        |
| Digestive diseases       | Urogenital diseases      | IBS                 | Recurring UTI                       | 12.862         | 1.466      | 1.242        | 1.721        |
| Skin diseases            | Psychiatric conditions   | Eczema              | GAD                                 | 24.652         | 1.466      | 1.282        | 1.673        |
| Urogenital diseases      | Digestive diseases       | Recurring UTI       | IBS                                 | 14.087         | 1.465      | 1.242        | 1.721        |
| Psychiatric conditions   | Skin diseases            | Burnout             | Acne                                | 10.436         | 1.463      | 1.257        | 1.698        |
| Psychiatric conditions   | Skin diseases            | GAD                 | Eczema                              | 13.374         | 1.462      | 1.279        | 1.668        |



| Group of Condition 1                                                                                                                                                                                                   | Group of Condition 2   | Condition 1 ...     | ... in individuals with Condition 2 | Prevalence (%) | Odds ratio | Lower 95%-CI | Upper 95%-CI |
|------------------------------------------------------------------------------------------------------------------------------------------------------------------------------------------------------------------------|------------------------|---------------------|-------------------------------------|----------------|------------|--------------|--------------|
| Pulmonary diseases                                                                                                                                                                                                     | Neurological diseases  | Asthma              | Migraine                            | 13.100         | 1.445      | 1.265        | 1.647        |
| Neurological diseases                                                                                                                                                                                                  | Pulmonary diseases     | Migraine            | Asthma                              | 20.504         | 1.444      | 1.264        | 1.646        |
| Skin diseases                                                                                                                                                                                                          | Digestive diseases     | Eczema              | Lactose intolerance                 | 23.494         | 1.438      | 1.258        | 1.641        |
| Digestive diseases                                                                                                                                                                                                     | Skin diseases          | Lactose intolerance | Eczema                              | 11.888         | 1.438      | 1.257        | 1.640        |
| Urogenital diseases                                                                                                                                                                                                    | Psychiatric conditions | Recurring UTI       | Depression                          | 13.454         | 1.437      | 1.266        | 1.629        |
| Skin diseases                                                                                                                                                                                                          | Psychiatric conditions | Acne                | Burnout                             | 17.647         | 1.431      | 1.229        | 1.660        |
| Psychiatric conditions                                                                                                                                                                                                 | Neurological diseases  | GAD                 | Migraine                            | 13.352         | 1.428      | 1.239        | 1.641        |
| Psychiatric conditions                                                                                                                                                                                                 | Urogenital diseases    | Depression          | Recurring UTI                       | 26.551         | 1.427      | 1.256        | 1.617        |
| Neurological diseases                                                                                                                                                                                                  | Psychiatric conditions | Migraine            | GAD                                 | 21.815         | 1.426      | 1.236        | 1.639        |
| Psychiatric conditions                                                                                                                                                                                                 | Skin diseases          | Depression          | Eczema                              | 25.042         | 1.418      | 1.282        | 1.567        |
| Skin diseases                                                                                                                                                                                                          | Psychiatric conditions | Eczema              | Depression                          | 23.067         | 1.416      | 1.281        | 1.565        |
| Skin diseases                                                                                                                                                                                                          | Psychiatric conditions | Herpes              | GAD                                 | 24.446         | 1.392      | 1.218        | 1.587        |
| Psychiatric conditions                                                                                                                                                                                                 | Skin diseases          | GAD                 | Herpes                              | 12.447         | 1.383      | 1.210        | 1.576        |
| Abbreviations: CI = Confidence Interval; GAD = Generalized Anxiety Disorder; IBS = Irritable Bowel Syndrome; OCD = Obsessive-Compulsive Disorder; PTSD = Posttraumatic Stress Disorder; UTI = Urinary Tract Infection. |                        |                     |                                     |                |            |              |              |
